# Supplementary material for: Higher spin states in some low-energy bis(tetramethyl-1,2-diaza-3,5-diborolyl) sandwich compounds of the first row transition metals: boraza analogues of the metallocenes
Source: Royal Society of Chemistry journal article supplement (doi:10.1039/c8nj05517c), 2019-01-01
Supplement: c8nj05517c1.pdf [file c8nj05517c1.pdf]

# Higher Spin States in Some Low-Energy Bis(Tetramethyl-1,2-diaza-3,5-diboroly) Sandwich Compounds of the First Row Transition Metals: Boraza Analogues of the Metallocenes

Jianlin Chen,<sup>a\*</sup> Hao Feng,<sup>a</sup> Yaoming Xie,<sup>b</sup> R. Bruce King,<sup>a,b\*</sup> Henry F. Schaefer<sup>b</sup>

<sup>a</sup>*School of Science, Research Center for Advanced Computation  
Xihua University, Chengdu, China 610039*

<sup>b</sup>*Department of Chemistry and Center for Computational Chemistry  
University of Georgia, Athens, Georgia 30602, USA*

E-mail: rbking@chem.uga.edu, [chenjianlin2000@163.com](mailto:chenjianlin2000@163.com)

## Supporting Information.

**Tables S1 to S7.** Total energies ( $E$  in hartree), relative energies ( $\Delta E$  in kcal/mol), and numbers of imaginary vibrational frequencies (Nimg) for the  $(\text{Me}_4\text{B}_2\text{N}_2\text{CH})_2\text{M}$  structures.

**Tables S8 to S35:** Atomic coordinates of the optimized structures for the  $(\text{Me}_4\text{B}_2\text{N}_2\text{CH})_2\text{M}$  complexes.

**Table S1.** Total energies ( $E$  in hartree), relative energies ( $\Delta E$  in kcal/mol), the number of imaginary vibrational frequencies (Nimg) for the  $(\text{Me}_4\text{B}_2\text{N}_2\text{CH})_2\text{Ti}_2$  structures.

|                   |       | <b>Ti-t-144(C<sub>2</sub>)</b> |         |         | <b>Ti-t-180(C<sub>i</sub>)</b> |         |         |
|-------------------|-------|--------------------------------|---------|---------|--------------------------------|---------|---------|
|                   |       | M06-L                          | BP86    | B3LYP*  | M06-L                          | BP86    | B3LYP*  |
| -E                | -1564 | 0.77147                        | 0.96500 | 0.25550 | 0.76922                        | 0.96379 | 0.25498 |
| $\square\Delta E$ |       | 0.0                            | 0.0     | 0.0     | 1.4                            | 0.8     | 0.3     |
| Nimg              |       | none                           | none    | none    | 1 (50i)                        | none    | none    |
|                   |       | <b>Ti-s-144(C<sub>2</sub>)</b> |         |         | <b>Ti-s-0(C<sub>s</sub>)</b>   |         |         |
|                   |       | M06-L                          | BP86    | B3LYP*  | M06-L                          | BP86    | B3LYP*  |
| -E                | -1564 | 0.75188                        | 0.94956 | 0.23103 | 0.74602                        | 0.94432 | 0.22572 |
| $\square\Delta E$ |       | 12.3                           | 9.7     | 15.3    | 16.0                           | 13.0    | 18.7    |
| Nimg              |       | none                           | none    | none    | none                           | none    | none    |

**Table S2.** Total energies ( $E$  in hartree), relative energies ( $\Delta E$  in kcal/mol), the number of imaginary vibrational frequencies (Nimg), spin expectation values ( $\langle S^2 \rangle$ ) for the  $(\text{Me}_4\text{B}_2\text{N}_2\text{CH})_2\text{V}_2$  structures.

|                   |       | <b>V-q-180(C<sub>2h</sub>)</b> |         |         | <b>V-d-180(C<sub>2h</sub>)</b> |         |            |
|-------------------|-------|--------------------------------|---------|---------|--------------------------------|---------|------------|
|                   |       | M06-L                          | BP86    | B3LYP*  | M06-L                          | BP86    | B3LYP*     |
| -E                | -1658 | 1.32504                        | 1.54038 | 0.80300 | 1.27352                        | 1.51714 | 0.76048    |
| $\square\Delta E$ |       | 0.0                            | 0.0     | 0.0     | 32.3                           | 14.6    | 26.7       |
| Nimg              |       | none                           | none    | none    | 2(84i,43i)                     | none    | 2(50i,19i) |

**Table S3.** Total energies ( $E$  in hartree), relative energies ( $\Delta E$  in kcal/mol), the number of imaginary vibrational frequencies (Nimg), spin expectation values ( $\langle S^2 \rangle$ ) for the  $(\text{Me}_4\text{B}_2\text{N}_2\text{CH})_2\text{Cr}_2$  structures.

|                   |       | <b>Cr-p-180(C<sub>i</sub>)</b> |         |         | <b>Cr-p-144(C<sub>2</sub>)</b> |         |         |
|-------------------|-------|--------------------------------|---------|---------|--------------------------------|---------|---------|
|                   |       | M06-L                          | BP86    | B3LYP*  | M06-L                          | BP86    | B3LYP*  |
| -E                | -1759 | 0.77266                        | 1.00702 | 0.25093 | 0.77163                        | 1.00686 | 0.25056 |
| $\square\Delta E$ |       | 0.0                            | 0.0     | 0.0     | 0.6                            | 1.4     | 0.2     |
| Nimg              |       | none                           | none    | none    | none                           | none    | none    |
|                   |       | <b>Cr-t-180(C<sub>i</sub>)</b> |         |         | <b>Cr-p-36(C<sub>2</sub>)</b>  |         |         |
|                   |       | M06-L                          | BP86    | B3LYP*  | M06-L                          | BP86    | B3LYP*  |
| -E                | -1759 | 0.76005                        | 1.00905 | 0.23712 | 0.77140                        | 1.00437 | 0.24783 |
| $\square\Delta E$ |       | 7.9                            | -1.3    | 8.7     | 0.8                            | 1.7     | 1.9     |
| Nimg              |       | none                           | none    | none    | none                           | none    | none    |
|                   |       | <b>Cr-t-72(C<sub>2</sub>)</b>  |         |         |                                |         |         |
|                   |       | M06-L                          | BP86    | B3LYP*  |                                |         |         |
| -E                | -1759 | 0.75351                        | 0.00333 | 0.23057 |                                |         |         |
| $\square\Delta E$ |       | 12.0                           | 3.6     | 12.6    |                                |         |         |
| Nimg              |       | none                           | none    | none    |                                |         |         |

**Table S4.** Total energies ( $E$  in hartree), relative energies ( $\Delta E$  in kcal/mol), the number of imaginary vibrational frequencies (Nimg), spin expectation values ( $\langle S^2 \rangle$ ) for the  $(\text{Me}_4\text{B}_2\text{N}_2\text{CH})_2\text{Mn}_2$  structures.

|                   |         | <b>Mn-x-144(C<sub>2</sub>)</b> |         |         | <b>Mn-d-180(C<sub>i</sub>)</b> |         |  |
|-------------------|---------|--------------------------------|---------|---------|--------------------------------|---------|--|
|                   | M06-L   | BP86                           | B3LYP*  | M06-L   | BP86                           | B3LYP*  |  |
| -E -1865          | 1.30156 | 1.54743                        | 0.77622 | 1.26715 | 1.55115                        | 0.75317 |  |
| $\square\Delta E$ | 0.0     | 0.0                            | 0.0     | 21.6    | -2.3                           | 14.5    |  |
| Nimg              | none    | none                           | none    | none    | none                           | none    |  |
|                   |         | <b>Mn-q-180(C<sub>i</sub>)</b> |         |         | <b>Mn-q-36(C<sub>2</sub>)</b>  |         |  |
|                   | M06-L   | BP86                           | B3LYP*  | M06-L   | BP86                           | B3LYP*  |  |
| -E-1865           | 1.27301 | 0.54220                        | 0.75317 | 1.27133 | 0.53988                        | 0.75036 |  |
| $\square\Delta E$ | 17.9    | 5.6                            | 14.5    | 18.9    | 7.1                            | 16.2    |  |
| Nimg              | none    | none                           | none    | none    | none                           | none    |  |
|                   |         | <b>Mn-q-144(C<sub>2</sub>)</b> |         |         |                                |         |  |
|                   | M06-L   | BP86                           | B3LYP*  |         |                                |         |  |
| -E - 1865         | 1.26228 | 0.53304                        | 0.74675 |         |                                |         |  |
| $\square\Delta E$ | 24.6    | 11.4                           | 18.5    |         |                                |         |  |
| Nimg              | none    | none                           | none    |         |                                |         |  |

**Table S5.** Total energies ( $E$  in hartree), relative energies ( $\Delta E$  in kcal/mol), the number of imaginary vibrational frequencies (Nimg), spin expectation values ( $\langle S^2 \rangle$ ) for the  $(\text{Me}_4\text{B}_2\text{N}_2\text{CH})_2\text{Fe}_2$  structures.

|                   |         | <b>Fe-s-180(C<sub>2</sub>)</b> |          |         | <b>Fe-s-72(C<sub>2</sub>)</b>  |         |  |
|-------------------|---------|--------------------------------|----------|---------|--------------------------------|---------|--|
|                   | M06-L   | BP86                           | B3LYP*   | M06-L   | BP86                           | B3LYP*  |  |
| -E -1978          | 1.00577 | 1.31421                        | 0.48220  | 1.00018 | 1.30947                        | 0.47615 |  |
| $\square\Delta E$ | 0.0     | 0.0                            | 0.0      | 3.5     | 3.0                            | 3.8     |  |
| Nimg              | none    | none                           | none     | none    | none                           | none    |  |
|                   |         | <b>Fe-t-180(C<sub>i</sub>)</b> |          |         | <b>Fe-t-36(C<sub>2</sub>)</b>  |         |  |
|                   | M06-L   | BP86                           | BLYP*    | M06-L   | BP86                           | B3LYP*  |  |
| -E- 1978          | 0.98484 | 1.28981                        | 0.473553 | 0.98339 | 1.28877                        | 0.47103 |  |
| $\square\Delta E$ | 13.1    | 15.3                           | 5.4      | 14.0    | 16.0                           | 6.9     |  |
| Nimg              | none    | none                           | none     | none    | none                           | none    |  |
|                   |         | <b>Fe-t-144(C<sub>2</sub>)</b> |          |         | <b>Fe-p-180(C<sub>i</sub>)</b> |         |  |
|                   | M06-L   | BP86                           | B3LYP*   | M06-L   | BP86                           | B3LYP*  |  |
| -E -1978          | 0.97733 | 1.28355                        | 0.46736  | 0.99074 | 1.27619                        | 0.47364 |  |
| $\square\Delta E$ | 17.8    | 16.2                           | 9.3      | 9.4     | 23.8                           | 5.3     |  |
| Nimg              | none    | none                           | none     | 1(24i)  | none                           | none    |  |



**Table S8.** Atomic coordinates of the optimized structures for the **Ti-t-144** complexes.

| M06-L |           |           | B3LYP*    |    |           |           |           |
|-------|-----------|-----------|-----------|----|-----------|-----------|-----------|
|       | X         | Y         | Z         |    | X         | Y         | Z         |
| 6     | 2.322581  | -0.376088 | 0.796889  | 6  | 2.384655  | -0.404427 | 0.671748  |
| 1     | 3.003329  | 0.296811  | 1.313465  | 1  | 3.104415  | 0.286161  | 1.114662  |
| 1     | -3.003329 | -0.296811 | 1.313465  | 1  | -3.104415 | -0.286161 | 1.114662  |
| 6     | -2.322581 | 0.376088  | 0.796889  | 6  | -2.384655 | 0.404427  | 0.671748  |
| 5     | 2.116950  | -0.421759 | -0.697048 | 5  | 2.144542  | -0.591849 | -0.810717 |
| 5     | -2.116950 | 0.421759  | -0.697048 | 5  | -2.144542 | 0.591849  | -0.810717 |
| 5     | -1.656642 | 1.582127  | 1.396608  | 5  | -1.719525 | 1.551422  | 1.392238  |
| 5     | 1.656642  | -1.582127 | 1.396608  | 5  | 1.719525  | -1.551422 | 1.392238  |
| 7     | 1.032442  | -1.425965 | -0.902891 | 7  | 1.026108  | -1.569719 | -0.904357 |
| 7     | 0.771299  | -2.111956 | 0.334936  | 7  | 0.759118  | -2.126336 | 0.413011  |
| 7     | -1.032442 | 1.425965  | -0.902891 | 7  | -1.026108 | 1.569719  | -0.904357 |
| 7     | -0.771299 | 2.111956  | 0.334936  | 7  | -0.759118 | 2.126336  | 0.413011  |
| 6     | -2.742420 | -0.331938 | -1.931065 | 6  | -2.773760 | -0.044707 | -2.123288 |
| 1     | -3.601540 | 0.222436  | -2.332271 | 1  | -3.455930 | 0.671577  | -2.611635 |
| 1     | -2.051787 | -0.471499 | -2.773956 | 1  | -2.028719 | -0.333889 | -2.881790 |
| 1     | -3.121885 | -1.321163 | -1.652140 | 1  | -3.369506 | -0.936402 | -1.884173 |
| 6     | -1.510105 | 2.167978  | 2.850078  | 6  | -1.756201 | 2.088827  | 2.883235  |
| 1     | -2.172238 | 1.670761  | 3.563283  | 1  | -2.384171 | 1.450563  | 3.518799  |
| 1     | -0.483878 | 2.051725  | 3.232568  | 1  | -0.758468 | 2.140922  | 3.349414  |
| 1     | -1.726009 | 3.243297  | 2.894909  | 1  | -2.176386 | 3.107738  | 2.926457  |
| 6     | 0.103533  | 3.262507  | 0.323409  | 6  | 0.000000  | 3.365640  | 0.511952  |
| 1     | -0.327561 | 4.108432  | -0.230106 | 1  | -0.536136 | 4.217583  | 0.062825  |
| 1     | 0.241886  | 3.567585  | 1.362831  | 1  | 0.137473  | 3.571933  | 1.578875  |
| 1     | 1.092049  | 3.027632  | -0.091829 | 1  | 0.994276  | 3.282359  | 0.053086  |
| 6     | -0.585877 | 2.044729  | -2.130940 | 6  | -0.565977 | 2.299972  | -2.077014 |
| 1     | -1.134579 | 2.972229  | -2.343686 | 1  | -1.062023 | 3.279288  | -2.171617 |
| 1     | 0.489437  | 2.257416  | -2.122782 | 1  | 0.522758  | 2.445269  | -2.080270 |
| 1     | -0.783911 | 1.338535  | -2.941191 | 1  | -0.831038 | 1.699052  | -2.953753 |
| 6     | 2.742420  | 0.331938  | -1.931065 | 6  | 2.773760  | 0.044707  | -2.123288 |
| 1     | 2.051787  | 0.471499  | -2.773956 | 1  | 2.028719  | 0.333889  | -2.881790 |
| 1     | 3.121885  | 1.321163  | -1.652140 | 1  | 3.369506  | 0.936402  | -1.884173 |
| 1     | 3.601540  | -0.222436 | -2.332271 | 1  | 3.455930  | -0.671577 | -2.611635 |
| 6     | 1.510105  | -2.167978 | 2.850078  | 6  | 1.756201  | -2.088827 | 2.883235  |
| 1     | 0.483878  | -2.051725 | 3.232568  | 1  | 0.758468  | -2.140922 | 3.349414  |
| 1     | 1.726009  | -3.243297 | 2.894909  | 1  | 2.176386  | -3.107738 | 2.926457  |
| 1     | 2.172238  | -1.670761 | 3.563283  | 1  | 2.384171  | -1.450563 | 3.518799  |
| 6     | -0.103533 | -3.262507 | 0.323409  | 6  | 0.000000  | -3.365640 | 0.511952  |
| 1     | 0.327561  | -4.108432 | -0.230106 | 1  | 0.536136  | -4.217583 | 0.062825  |
| 1     | -0.241886 | -3.567585 | 1.362831  | 1  | -0.137473 | -3.571933 | 1.578875  |
| 1     | -1.092049 | -3.027632 | -0.091829 | 1  | -0.994276 | -3.282359 | 0.053086  |
| 6     | 0.585877  | -2.044729 | -2.130940 | 6  | 0.565977  | -2.299972 | -2.077014 |
| 1     | 1.134579  | -2.972229 | -2.343686 | 1  | 1.062023  | -3.279288 | -2.171617 |
| 1     | -0.489437 | -2.257416 | -2.122782 | 1  | -0.522758 | -2.445269 | -2.080270 |
| 1     | 0.783911  | -1.338535 | -2.941191 | 1  | 0.831038  | -1.699052 | -2.953753 |
| 22    | 0.000000  | 0.000000  | 0.418247  | 22 | 0.000000  | 0.000000  | 0.301013  |

**Table S9.** Atomic coordinates of the optimized structures for the **Ti-t-180** complexes.

| M06-L |           |           | B3LYP*    |    |           |           |           |
|-------|-----------|-----------|-----------|----|-----------|-----------|-----------|
| X     | Y         | Z         | X         | Y  | Z         |           |           |
| 6     | -0.978718 | 1.440533  | -1.623969 | 6  | -1.031356 | 1.428276  | -1.631423 |
| 1     | -0.497687 | 2.322272  | -2.045209 | 1  | -0.602856 | 2.317081  | -2.098128 |
| 1     | 0.497687  | -2.322272 | 2.045209  | 1  | 0.602856  | -2.317081 | 2.098128  |
| 6     | 0.978718  | -1.440533 | 1.623969  | 6  | 1.031356  | -1.428276 | 1.631423  |
| 5     | -1.940922 | 1.463614  | -0.464981 | 5  | -2.034103 | 1.436458  | -0.493422 |
| 5     | 0.964231  | -0.057358 | 2.222035  | 5  | 1.090817  | -0.048533 | 2.259893  |
| 5     | 1.940922  | -1.463614 | 0.464981  | 5  | 2.034103  | -1.436458 | 0.493422  |
| 5     | -0.964231 | 0.057358  | -2.222035 | 5  | -1.090817 | 0.048533  | -2.259893 |
| 7     | -2.232721 | 0.033973  | -0.198721 | 7  | -2.275682 | 0.009272  | -0.182384 |
| 7     | -1.651659 | -0.804209 | -1.218852 | 7  | -1.714204 | -0.820793 | -1.232062 |
| 7     | 1.651659  | 0.804209  | 1.218852  | 7  | 1.714204  | 0.820793  | 1.232062  |
| 7     | 2.232721  | -0.033973 | 0.198721  | 7  | 2.275682  | -0.009272 | 0.182384  |
| 6     | 0.330635  | 0.608982  | 3.501005  | 6  | 0.580321  | 0.557099  | 3.635013  |
| 1     | 1.092563  | 0.851400  | 4.254399  | 1  | 1.431845  | 0.797225  | 4.294018  |
| 1     | -0.192851 | 1.550350  | 3.280476  | 1  | -0.000130 | 1.486513  | 3.520342  |
| 1     | -0.390478 | -0.054981 | 3.988052  | 1  | -0.049845 | -0.162450 | 4.175024  |
| 6     | 2.526276  | -2.567558 | -0.490573 | 6  | 2.699467  | -2.583804 | -0.377113 |
| 1     | 2.051613  | -3.538896 | -0.325408 | 1  | 2.262637  | -3.563395 | -0.140892 |
| 1     | 2.398472  | -2.323137 | -1.554543 | 1  | 2.597558  | -2.429228 | -1.463386 |
| 1     | 3.604430  | -2.708089 | -0.336338 | 1  | 3.780743  | -2.653051 | -0.170260 |
| 6     | 2.995695  | 0.597867  | -0.856018 | 6  | 3.236117  | 0.576473  | -0.741279 |
| 1     | 3.918153  | 1.059207  | -0.480371 | 1  | 4.165995  | 0.881610  | -0.234465 |
| 1     | 3.265156  | -0.183538 | -1.569915 | 1  | 3.485619  | -0.196289 | -1.476244 |
| 1     | 2.417414  | 1.363165  | -1.394220 | 1  | 2.821947  | 1.438534  | -1.282058 |
| 6     | 2.157849  | 2.148778  | 1.379446  | 6  | 2.218083  | 2.176735  | 1.395538  |
| 1     | 3.196922  | 2.157308  | 1.737534  | 1  | 3.271811  | 2.188767  | 1.719731  |
| 1     | 2.093948  | 2.733916  | 0.454850  | 1  | 2.116789  | 2.773543  | 0.479489  |
| 1     | 1.530982  | 2.637876  | 2.128306  | 1  | 1.614220  | 2.651838  | 2.176253  |
| 6     | -2.526276 | 2.567558  | 0.490573  | 6  | -2.699467 | 2.583804  | 0.377113  |
| 1     | -2.398472 | 2.323137  | 1.554543  | 1  | -2.597558 | 2.429228  | 1.463386  |
| 1     | -2.051613 | 3.538896  | 0.325408  | 1  | -2.262637 | 3.563395  | 0.140892  |
| 1     | -3.604430 | 2.708089  | 0.336338  | 1  | -3.780743 | 2.653051  | 0.170260  |
| 6     | -0.330635 | -0.608982 | -3.501005 | 6  | -0.580321 | -0.557099 | -3.635013 |
| 1     | 0.192851  | -1.550350 | -3.280476 | 1  | 0.000130  | -1.486513 | -3.520342 |
| 1     | -1.092563 | -0.851400 | -4.254399 | 1  | -1.431845 | -0.797225 | -4.294018 |
| 1     | 0.390478  | 0.054981  | -3.988052 | 1  | 0.049845  | 0.162450  | -4.175024 |
| 6     | -2.157849 | -2.148778 | -1.379446 | 6  | -2.218083 | -2.176735 | -1.395538 |
| 1     | -3.196922 | -2.157308 | -1.737534 | 1  | -3.271811 | -2.188767 | -1.719731 |
| 1     | -1.530982 | -2.637876 | -2.128306 | 1  | -1.614220 | -2.651838 | -2.176253 |
| 1     | -2.093948 | -2.733916 | -0.454850 | 1  | -2.116789 | -2.773543 | -0.479489 |
| 6     | -2.995695 | -0.597867 | 0.856018  | 6  | -3.236117 | -0.576473 | 0.741279  |
| 1     | -3.918153 | -1.059207 | 0.480371  | 1  | -4.165995 | -0.881610 | 0.234465  |
| 1     | -2.417414 | -1.363165 | 1.394220  | 1  | -2.821947 | -1.438534 | 1.282058  |
| 1     | -3.265156 | 0.183538  | 1.569915  | 1  | -3.485619 | 0.196289  | 1.476244  |
| 22    | 0.000000  | 0.000000  | 0.000000  | 22 | 0.000000  | 0.000000  | 0.000000  |

**Table S10.** Atomic coordinates of the optimized structures for the **Ti-s-144** complexes.

| M06-L |           |           | B3LYP*    |    |           |           |           |
|-------|-----------|-----------|-----------|----|-----------|-----------|-----------|
| X     | Y         | Z         | X         | Y  | Z         |           |           |
| 6     | -2.105744 | -0.061381 | -0.703775 | 6  | -2.183388 | -0.127462 | -0.579151 |
| 1     | -2.612425 | 0.793996  | -1.148336 | 1  | -2.779907 | 0.695211  | -0.978355 |
| 1     | 2.612425  | -0.793996 | -1.148336 | 1  | 2.779907  | -0.695211 | -0.978355 |
| 6     | 2.105744  | 0.061381  | -0.703775 | 6  | 2.183388  | 0.127462  | -0.579151 |
| 5     | -2.380428 | -0.633378 | 0.642293  | 5  | -2.376540 | -0.788520 | 0.756827  |
| 5     | 2.380428  | 0.633378  | 0.642293  | 5  | 2.376540  | 0.788520  | 0.756827  |
| 5     | 1.100946  | 0.939068  | -1.464936 | 5  | 1.252004  | 1.002047  | -1.440821 |
| 5     | -1.100946 | -0.939068 | -1.464936 | 5  | -1.252004 | -1.002047 | -1.440821 |
| 7     | -1.324633 | -1.671915 | 0.838485  | 7  | -1.270347 | -1.774306 | 0.856796  |
| 7     | -0.578169 | -1.895240 | -0.379757 | 7  | -0.596156 | -1.929722 | -0.426458 |
| 7     | 1.324633  | 1.671915  | 0.838485  | 7  | 1.270347  | 1.774306  | 0.856796  |
| 7     | 0.578169  | 1.895240  | -0.379757 | 7  | 0.596156  | 1.929722  | -0.426458 |
| 6     | 3.244301  | 0.229394  | 1.895289  | 6  | 3.298876  | 0.510591  | 2.017384  |
| 1     | 3.854337  | 1.061474  | 2.269796  | 1  | 3.905106  | 1.394560  | 2.274995  |
| 1     | 2.617189  | -0.086385 | 2.745311  | 1  | 2.722088  | 0.253333  | 2.922931  |
| 1     | 3.922584  | -0.599400 | 1.677308  | 1  | 3.993226  | -0.318087 | 1.825519  |
| 6     | 0.877923  | 1.333733  | -2.971616 | 6  | 1.162452  | 1.287505  | -2.996799 |
| 1     | 1.169500  | 0.529797  | -3.653512 | 1  | 1.495767  | 0.412679  | -3.571775 |
| 1     | -0.165017 | 1.587700  | -3.206837 | 1  | 0.151528  | 1.540800  | -3.349593 |
| 1     | 1.486274  | 2.209772  | -3.240772 | 1  | 1.826435  | 2.123315  | -3.278520 |
| 6     | 0.000000  | 3.200800  | -0.600034 | 6  | 0.000000  | 3.221383  | -0.735578 |
| 1     | 0.774840  | 3.968664  | -0.734374 | 1  | 0.767686  | 4.007537  | -0.825976 |
| 1     | -0.585056 | 3.136294  | -1.519282 | 1  | -0.505557 | 3.115809  | -1.700816 |
| 1     | -0.674310 | 3.508295  | 0.207672  | 1  | -0.748283 | 3.529640  | 0.006956  |
| 6     | 0.964212  | 2.461882  | 1.993912  | 6  | 0.859913  | 2.628247  | 1.959984  |
| 1     | 1.224073  | 3.521501  | 1.868403  | 1  | 1.112411  | 3.685504  | 1.781989  |
| 1     | -0.112406 | 2.405980  | 2.220544  | 1  | -0.221512 | 2.562036  | 2.162624  |
| 1     | 1.517143  | 2.069664  | 2.850393  | 1  | 1.397878  | 2.291500  | 2.852972  |
| 6     | -3.244301 | -0.229394 | 1.895289  | 6  | -3.298876 | -0.510591 | 2.017384  |
| 1     | -2.617189 | 0.086385  | 2.745311  | 1  | -2.722088 | -0.253333 | 2.922931  |
| 1     | -3.922584 | 0.599400  | 1.677308  | 1  | -3.993226 | 0.318087  | 1.825519  |
| 1     | -3.854337 | -1.061474 | 2.269796  | 1  | -3.905106 | -1.394560 | 2.274995  |
| 6     | -0.877923 | -1.333733 | -2.971616 | 6  | -1.162452 | -1.287505 | -2.996799 |
| 1     | 0.165017  | -1.587700 | -3.206837 | 1  | -0.151528 | -1.540800 | -3.349593 |
| 1     | -1.486274 | -2.209772 | -3.240772 | 1  | -1.826435 | -2.123315 | -3.278520 |
| 1     | -1.169500 | -0.529797 | -3.653512 | 1  | -1.495767 | -0.412679 | -3.571775 |
| 6     | 0.000000  | -3.200800 | -0.600034 | 6  | 0.000000  | -3.221383 | -0.735578 |
| 1     | -0.774840 | -3.968664 | -0.734374 | 1  | -0.767686 | -4.007537 | -0.825976 |
| 1     | 0.585056  | -3.136294 | -1.519282 | 1  | 0.505557  | -3.115809 | -1.700816 |
| 1     | 0.674310  | -3.508295 | 0.207672  | 1  | 0.748283  | -3.529640 | 0.006956  |
| 6     | -0.964212 | -2.461882 | 1.993912  | 6  | -0.859913 | -2.628247 | 1.959984  |
| 1     | -1.224073 | -3.521501 | 1.868403  | 1  | -1.112411 | -3.685504 | 1.781989  |
| 1     | 0.112406  | -2.405980 | 2.220544  | 1  | 0.221512  | -2.562036 | 2.162624  |
| 1     | -1.517143 | -2.069664 | 2.850393  | 1  | -1.397878 | -2.291500 | 2.852972  |
| 22    | 0.000000  | 0.000000  | 0.262104  | 22 | 0.000000  | 0.000000  | 0.208147  |

**Table S11.** Atomic coordinates of the optimized structures for the **Ti-s-0** complexes.

| M06-L |           |           | B3LYP*    |    |           |           |           |
|-------|-----------|-----------|-----------|----|-----------|-----------|-----------|
| X     | Y         | Z         | X         | Y  | Z         |           |           |
| 6     | -0.045458 | -1.662335 | 1.663093  | 6  | -0.030685 | -1.651733 | 1.734076  |
| 1     | -0.067642 | -2.740781 | 1.531755  | 1  | -0.032448 | -2.737458 | 1.634649  |
| 1     | -0.067642 | -2.740781 | -1.531755 | 1  | -0.032448 | -2.737458 | -1.634649 |
| 6     | -0.045458 | -1.662335 | -1.663093 | 6  | -0.030685 | -1.651733 | -1.734076 |
| 5     | -1.117961 | -0.832676 | 2.282586  | 5  | -1.136437 | -0.817836 | 2.322923  |
| 5     | 1.227852  | -0.812780 | -1.464776 | 5  | 1.238086  | -0.785464 | -1.626548 |
| 5     | -1.117961 | -0.832676 | -2.282586 | 5  | -1.136437 | -0.817836 | -2.322923 |
| 5     | 1.227852  | -0.812780 | 1.464776  | 5  | 1.238086  | -0.785464 | 1.626548  |
| 7     | -0.656006 | 0.574209  | 2.108629  | 7  | -0.690359 | 0.586223  | 2.138834  |
| 7     | 0.710153  | 0.623932  | 1.644424  | 7  | 0.705033  | 0.638883  | 1.727249  |
| 7     | 0.710153  | 0.623932  | -1.644424 | 7  | 0.705033  | 0.638883  | -1.727249 |
| 7     | -0.656006 | 0.574209  | -2.108629 | 7  | -0.690359 | 0.586223  | -2.138834 |
| 6     | 2.763208  | -1.114846 | -1.620179 | 6  | 2.784493  | -1.104275 | -1.757803 |
| 1     | 3.050752  | -1.132384 | -2.681504 | 1  | 3.097318  | -1.092625 | -2.816513 |
| 1     | 3.422868  | -0.388620 | -1.126745 | 1  | 3.441353  | -0.406097 | -1.217284 |
| 1     | 3.018508  | -2.097533 | -1.211919 | 1  | 3.000148  | -2.111309 | -1.375182 |
| 6     | -2.595584 | -1.064334 | -2.769195 | 6  | -2.603988 | -1.113529 | -2.843250 |
| 1     | -2.847571 | -2.126207 | -2.819798 | 1  | -2.812617 | -2.191204 | -2.845214 |
| 1     | -3.326848 | -0.599449 | -2.089286 | 1  | -3.377965 | -0.633533 | -2.219595 |
| 1     | -2.785809 | -0.631685 | -3.759831 | 1  | -2.753429 | -0.744187 | -3.871214 |
| 6     | -1.348956 | 1.831096  | -2.252511 | 6  | -1.395301 | 1.840045  | -2.335081 |
| 1     | -0.958863 | 2.432155  | -3.085061 | 1  | -1.008612 | 2.408250  | -3.195995 |
| 1     | -2.402189 | 1.614296  | -2.443993 | 1  | -2.447509 | 1.600669  | -2.523618 |
| 1     | -1.282819 | 2.452075  | -1.341274 | 1  | -1.345216 | 2.495201  | -1.447168 |
| 6     | 1.507772  | 1.769874  | -2.013457 | 6  | 1.490984  | 1.781891  | -2.168227 |
| 1     | 1.663901  | 1.821735  | -3.099932 | 1  | 1.576408  | 1.810177  | -3.266993 |
| 1     | 1.075943  | 2.719607  | -1.671572 | 1  | 1.080564  | 2.739902  | -1.818397 |
| 1     | 2.482275  | 1.648964  | -1.534709 | 1  | 2.495893  | 1.666188  | -1.748657 |
| 6     | -2.595584 | -1.064334 | 2.769195  | 6  | -2.603988 | -1.113529 | 2.843250  |
| 1     | -3.326848 | -0.599449 | 2.089286  | 1  | -3.377965 | -0.633533 | 2.219595  |
| 1     | -2.847571 | -2.126207 | 2.819798  | 1  | -2.812617 | -2.191204 | 2.845214  |
| 1     | -2.785809 | -0.631685 | 3.759831  | 1  | -2.753429 | -0.744187 | 3.871214  |
| 6     | 2.763208  | -1.114846 | 1.620179  | 6  | 2.784493  | -1.104275 | 1.757803  |
| 1     | 3.422868  | -0.388620 | 1.126745  | 1  | 3.441353  | -0.406097 | 1.217284  |
| 1     | 3.050752  | -1.132384 | 2.681504  | 1  | 3.097318  | -1.092625 | 2.816513  |
| 1     | 3.018508  | -2.097533 | 1.211919  | 1  | 3.000148  | -2.111309 | 1.375182  |
| 6     | 1.507772  | 1.769874  | 2.013457  | 6  | 1.490984  | 1.781891  | 2.168227  |
| 1     | 1.663901  | 1.821735  | 3.099932  | 1  | 1.576408  | 1.810177  | 3.266993  |
| 1     | 2.482275  | 1.648964  | 1.534709  | 1  | 2.495893  | 1.666188  | 1.748657  |
| 1     | 1.075943  | 2.719607  | 1.671572  | 1  | 1.080564  | 2.739902  | 1.818397  |
| 6     | -1.348956 | 1.831096  | 2.252511  | 6  | -1.395301 | 1.840045  | 2.335081  |
| 1     | -0.958863 | 2.432155  | 3.085061  | 1  | -1.008612 | 2.408250  | 3.195995  |
| 1     | -1.282819 | 2.452075  | 1.341274  | 1  | -1.345216 | 2.495201  | 1.447168  |
| 1     | -2.402189 | 1.614296  | 2.443993  | 1  | -2.447509 | 1.600669  | 2.523618  |
| 22    | -0.332444 | -0.153510 | 0.000000  | 22 | -0.272533 | -0.170691 | 0.000000  |



**Table S12.** Atomic coordinates of the optimized structures for the V-q-180 complexes.

| M06-L |           |           | B3LYP*    |    |           |           |           |
|-------|-----------|-----------|-----------|----|-----------|-----------|-----------|
| X     | Y         | Z         | X         | Y  | Z         |           |           |
| 6     | 0.631654  | 2.241391  | 0.000000  | 6  | 0.658557  | 2.292375  | 0.000000  |
| 1     | 1.656715  | 2.607988  | 0.000000  | 1  | 1.679610  | 2.678265  | 0.000000  |
| 1     | -1.656715 | -2.607988 | 0.000000  | 1  | -1.679610 | -2.678265 | 0.000000  |
| 6     | -0.631654 | -2.241391 | 0.000000  | 6  | -0.658557 | -2.292375 | 0.000000  |
| 5     | -0.214780 | 2.028749  | 1.225622  | 5  | -0.205086 | 2.105560  | 1.225129  |
| 5     | 0.214780  | -2.028749 | 1.225622  | 5  | 0.205086  | -2.105560 | 1.225129  |
| 5     | 0.214780  | -2.028749 | -1.225622 | 5  | 0.205086  | -2.105560 | -1.225129 |
| 5     | -0.214780 | 2.028749  | -1.225622 | 5  | -0.205086 | 2.105560  | -1.225129 |
| 7     | -1.468040 | 1.404775  | 0.720433  | 7  | -1.447619 | 1.451399  | 0.727555  |
| 7     | -1.468040 | 1.404775  | -0.720433 | 7  | -1.447619 | 1.451399  | -0.727555 |
| 7     | 1.468040  | -1.404775 | 0.720433  | 7  | 1.447619  | -1.451399 | 0.727555  |
| 7     | 1.468040  | -1.404775 | -0.720433 | 7  | 1.447619  | -1.451399 | -0.727555 |
| 6     | 0.000000  | -2.182507 | 2.777590  | 6  | 0.000000  | -2.369874 | 2.776415  |
| 1     | 0.539276  | -3.051806 | 3.176645  | 1  | 0.595397  | -3.238178 | 3.105539  |
| 1     | 0.350630  | -1.314193 | 3.352712  | 1  | 0.298032  | -1.522902 | 3.415165  |
| 1     | -1.056201 | -2.328120 | 3.024636  | 1  | -1.050287 | -2.600688 | 3.000569  |
| 6     | 0.000000  | -2.182507 | -2.777590 | 6  | 0.000000  | -2.369874 | -2.776415 |
| 1     | -1.056201 | -2.328120 | -3.024636 | 1  | -1.050287 | -2.600688 | -3.000569 |
| 1     | 0.350630  | -1.314193 | -3.352712 | 1  | 0.298032  | -1.522902 | -3.415165 |
| 1     | 0.539276  | -3.051806 | -3.176645 | 1  | 0.595397  | -3.238178 | -3.105539 |
| 6     | 2.679879  | -1.037594 | -1.418500 | 6  | 2.701367  | -1.221323 | -1.431209 |
| 1     | 3.481020  | -1.772700 | -1.265083 | 1  | 3.428358  | -2.028254 | -1.246175 |
| 1     | 2.438135  | -1.011006 | -2.483334 | 1  | 2.469715  | -1.209288 | -2.501595 |
| 1     | 3.042834  | -0.043685 | -1.130230 | 1  | 3.155390  | -0.256407 | -1.169758 |
| 6     | 2.679879  | -1.037594 | 1.418500  | 6  | 2.701367  | -1.221323 | 1.431209  |
| 1     | 3.481020  | -1.772700 | 1.265083  | 1  | 3.428358  | -2.028254 | 1.246175  |
| 1     | 3.042834  | -0.043685 | 1.130230  | 1  | 3.155390  | -0.256407 | 1.169758  |
| 1     | 2.438135  | -1.011006 | 2.483334  | 1  | 2.469715  | -1.209288 | 2.501595  |
| 6     | 0.000000  | 2.182507  | 2.777590  | 6  | 0.000000  | 2.369874  | 2.776415  |
| 1     | -0.350630 | 1.314193  | 3.352712  | 1  | -0.298032 | 1.522902  | 3.415165  |
| 1     | 1.056201  | 2.328120  | 3.024636  | 1  | 1.050287  | 2.600688  | 3.000569  |
| 1     | -0.539276 | 3.051806  | 3.176645  | 1  | -0.595397 | 3.238178  | 3.105539  |
| 6     | 0.000000  | 2.182507  | -2.777590 | 6  | 0.000000  | 2.369874  | -2.776415 |
| 1     | -0.350630 | 1.314193  | -3.352712 | 1  | -0.298032 | 1.522902  | -3.415165 |
| 1     | -0.539276 | 3.051806  | -3.176645 | 1  | -0.595397 | 3.238178  | -3.105539 |
| 1     | 1.056201  | 2.328120  | -3.024636 | 1  | 1.050287  | 2.600688  | -3.000569 |
| 6     | -2.679879 | 1.037594  | -1.418500 | 6  | -2.701367 | 1.221323  | -1.431209 |
| 1     | -3.481020 | 1.772700  | -1.265083 | 1  | -3.428358 | 2.028254  | -1.246175 |
| 1     | -2.438135 | 1.011006  | -2.483334 | 1  | -2.469715 | 1.209288  | -2.501595 |
| 1     | -3.042834 | 0.043685  | -1.130230 | 1  | -3.155390 | 0.256407  | -1.169758 |
| 6     | -2.679879 | 1.037594  | 1.418500  | 6  | -2.701367 | 1.221323  | 1.431209  |
| 1     | -3.481020 | 1.772700  | 1.265083  | 1  | -3.428358 | 2.028254  | 1.246175  |
| 1     | -3.042834 | 0.043685  | 1.130230  | 1  | -3.155390 | 0.256407  | 1.169758  |
| 1     | -2.438135 | 1.011006  | 2.483334  | 1  | -2.469715 | 1.209288  | 2.501595  |
| 23    | 0.000000  | 0.000000  | 0.000000  | 23 | 0.000000  | 0.000000  | 0.000000  |

**Table S13.** Atomic coordinates of the optimized structures for the V-d-180 complexes.

| M06-L |           |           | B3LYP*    |    |           |           |           |
|-------|-----------|-----------|-----------|----|-----------|-----------|-----------|
| X     | Y         | Z         | X         | Y  | Z         |           |           |
| 6     | 0.565178  | 2.318298  | 0.000000  | 6  | 0.595822  | 2.367786  | 0.000000  |
| 1     | 1.583609  | 2.704116  | 0.000000  | 1  | 1.610258  | 2.772826  | 0.000000  |
| 1     | -1.583609 | -2.704116 | 0.000000  | 1  | -1.610258 | -2.772826 | 0.000000  |
| 6     | -0.565178 | -2.318298 | 0.000000  | 6  | -0.595822 | -2.367786 | 0.000000  |
| 5     | -0.221804 | 1.981278  | 1.225958  | 5  | -0.211485 | 2.061491  | 1.229335  |
| 5     | 0.221804  | -1.981278 | 1.225958  | 5  | 0.211485  | -2.061491 | 1.229335  |
| 5     | 0.221804  | -1.981278 | -1.225958 | 5  | 0.211485  | -2.061491 | -1.229335 |
| 5     | -0.221804 | 1.981278  | -1.225958 | 5  | -0.211485 | 2.061491  | -1.229335 |
| 7     | -1.469367 | 1.298866  | 0.723717  | 7  | -1.443197 | 1.356569  | 0.731621  |
| 7     | -1.469367 | 1.298866  | -0.723717 | 7  | -1.443197 | 1.356569  | -0.731621 |
| 7     | 1.469367  | -1.298866 | 0.723717  | 7  | 1.443197  | -1.356569 | 0.731621  |
| 7     | 1.469367  | -1.298866 | -0.723717 | 7  | 1.443197  | -1.356569 | -0.731621 |
| 6     | 0.000000  | -2.086848 | 2.782808  | 6  | 0.000000  | -2.273910 | 2.789378  |
| 1     | 0.575885  | -2.914735 | 3.218247  | 1  | 0.633918  | -3.095423 | 3.163849  |
| 1     | 0.303471  | -1.184343 | 3.332485  | 1  | 0.241438  | -1.387289 | 3.398004  |
| 1     | -1.050562 | -2.274835 | 3.025846  | 1  | -1.040451 | -2.550984 | 3.007840  |
| 6     | 0.000000  | -2.086848 | -2.782808 | 6  | 0.000000  | -2.273910 | -2.789378 |
| 1     | -1.050562 | -2.274835 | -3.025846 | 1  | -1.040451 | -2.550984 | -3.007840 |
| 1     | 0.303471  | -1.184343 | -3.332485 | 1  | 0.241438  | -1.387289 | -3.398004 |
| 1     | 0.575885  | -2.914735 | -3.218247 | 1  | 0.633918  | -3.095423 | -3.163849 |
| 6     | 2.689282  | -0.955756 | -1.423945 | 6  | 2.695435  | -1.116423 | -1.438526 |
| 1     | 3.469354  | -1.714901 | -1.279215 | 1  | 3.421764  | -1.925749 | -1.262680 |
| 1     | 2.442175  | -0.915581 | -2.487154 | 1  | 2.457099  | -1.095701 | -2.507295 |
| 1     | 3.078547  | 0.025600  | -1.130252 | 1  | 3.148590  | -0.153435 | -1.170544 |
| 6     | 2.689282  | -0.955756 | 1.423945  | 6  | 2.695435  | -1.116423 | 1.438526  |
| 1     | 3.469354  | -1.714901 | 1.279215  | 1  | 3.421764  | -1.925749 | 1.262680  |
| 1     | 3.078547  | 0.025600  | 1.130252  | 1  | 3.148590  | -0.153435 | 1.170544  |
| 1     | 2.442175  | -0.915581 | 2.487154  | 1  | 2.457099  | -1.095701 | 2.507295  |
| 6     | 0.000000  | 2.086848  | 2.782808  | 6  | 0.000000  | 2.273910  | 2.789378  |
| 1     | -0.303471 | 1.184343  | 3.332485  | 1  | -0.241438 | 1.387289  | 3.398004  |
| 1     | 1.050562  | 2.274835  | 3.025846  | 1  | 1.040451  | 2.550984  | 3.007840  |
| 1     | -0.575885 | 2.914735  | 3.218247  | 1  | -0.633918 | 3.095423  | 3.163849  |
| 6     | 0.000000  | 2.086848  | -2.782808 | 6  | 0.000000  | 2.273910  | -2.789378 |
| 1     | -0.303471 | 1.184343  | -3.332485 | 1  | -0.241438 | 1.387289  | -3.398004 |
| 1     | -0.575885 | 2.914735  | -3.218247 | 1  | -0.633918 | 3.095423  | -3.163849 |
| 1     | 1.050562  | 2.274835  | -3.025846 | 1  | 1.040451  | 2.550984  | -3.007840 |
| 6     | -2.689282 | 0.955756  | -1.423945 | 6  | -2.695435 | 1.116423  | -1.438526 |
| 1     | -3.469354 | 1.714901  | -1.279215 | 1  | -3.421764 | 1.925749  | -1.262680 |
| 1     | -2.442175 | 0.915581  | -2.487154 | 1  | -2.457099 | 1.095701  | -2.507295 |
| 1     | -3.078547 | -0.025600 | -1.130252 | 1  | -3.148590 | 0.153435  | -1.170544 |
| 6     | -2.689282 | 0.955756  | 1.423945  | 6  | -2.695435 | 1.116423  | 1.438526  |
| 1     | -3.469354 | 1.714901  | 1.279215  | 1  | -3.421764 | 1.925749  | 1.262680  |
| 1     | -3.078547 | -0.025600 | 1.130252  | 1  | -3.148590 | 0.153435  | 1.170544  |
| 1     | -2.442175 | 0.915581  | 2.487154  | 1  | -2.457099 | 1.095701  | 2.507295  |
| 23    | 0.000000  | 0.000000  | 0.000000  | 23 | 0.000000  | 0.000000  | 0.000000  |

**Table S14.** Atomic coordinates of the optimized structures for the Cr-p-180 complexes.

| M06-L |           |           | B3LYP*    |    |           |           |           |
|-------|-----------|-----------|-----------|----|-----------|-----------|-----------|
| X     | Y         | Z         | X         | Y  | Z         |           |           |
| 6     | -1.330341 | 0.119205  | 1.833384  | 6  | -0.976125 | 1.444614  | -1.510161 |
| 1     | -0.953039 | 0.020297  | 2.849888  | 1  | -0.486536 | 2.331473  | -1.917102 |
| 1     | 0.953039  | -0.020297 | -2.849888 | 1  | 0.486536  | -2.331473 | 1.917102  |
| 6     | 1.330341  | -0.119205 | -1.833384 | 6  | 0.976125  | -1.444614 | 1.510161  |
| 5     | -2.017553 | -0.982920 | 1.038671  | 5  | -2.068375 | 1.454738  | -0.432508 |
| 5     | 1.505767  | -1.404240 | -1.078093 | 5  | 0.995784  | -0.079722 | 2.143947  |
| 5     | 2.017553  | 0.982920  | -1.038671 | 5  | 2.068375  | -1.454738 | 0.432508  |
| 5     | -1.505767 | 1.404240  | 1.078093  | 5  | -0.995784 | 0.079722  | -2.143947 |
| 7     | -2.430106 | -0.387123 | -0.236995 | 7  | -2.510160 | 0.071549  | -0.272964 |
| 7     | -1.893648 | 0.956201  | -0.298908 | 7  | -1.679854 | -0.782529 | -1.118386 |
| 7     | 1.893648  | -0.956201 | 0.298908  | 7  | 1.679854  | 0.782529  | 1.118386  |
| 7     | 2.430106  | 0.387123  | 0.236995  | 7  | 2.510160  | -0.071549 | 0.272964  |
| 6     | 1.226765  | -2.928392 | -1.349916 | 6  | 0.394815  | 0.551799  | 3.468661  |
| 1     | 2.159612  | -3.507333 | -1.379923 | 1  | 1.204484  | 0.812286  | 4.171418  |
| 1     | 0.605464  | -3.399103 | -0.574916 | 1  | -0.182467 | 1.475680  | 3.303179  |
| 1     | 0.722953  | -3.086075 | -2.307965 | 1  | -0.261129 | -0.161830 | 3.985201  |
| 6     | 2.273159  | 2.513773  | -1.307178 | 6  | 2.686564  | -2.618369 | -0.453278 |
| 1     | 1.925403  | 2.823915  | -2.296577 | 1  | 2.266759  | -3.596042 | -0.181122 |
| 1     | 1.767508  | 3.156276  | -0.572242 | 1  | 2.507396  | -2.472305 | -1.531319 |
| 1     | 3.338988  | 2.767704  | -1.244075 | 1  | 3.779097  | -2.682924 | -0.323806 |
| 6     | 2.670704  | 1.051028  | 1.498076  | 6  | 3.210218  | 0.551769  | -0.837076 |
| 1     | 3.484868  | 0.582609  | 2.065532  | 1  | 3.987281  | 1.253711  | -0.497872 |
| 1     | 2.966193  | 2.077531  | 1.270925  | 1  | 3.703856  | -0.250684 | -1.396389 |
| 1     | 1.776231  | 1.088831  | 2.143890  | 1  | 2.533894  | 1.086154  | -1.526872 |
| 6     | 2.365211  | -1.799480 | 1.378603  | 6  | 2.191734  | 2.124960  | 1.375726  |
| 1     | 3.448593  | -1.964443 | 1.310735  | 1  | 3.173308  | 2.083696  | 1.875149  |
| 1     | 2.130304  | -1.376553 | 2.361584  | 1  | 2.283125  | 2.713122  | 0.453523  |
| 1     | 1.857487  | -2.762974 | 1.293667  | 1  | 1.482590  | 2.633747  | 2.037215  |
| 6     | -2.273159 | -2.513773 | 1.307178  | 6  | -2.686564 | 2.618369  | 0.453278  |
| 1     | -1.767508 | -3.156276 | 0.572242  | 1  | -2.507396 | 2.472305  | 1.531319  |
| 1     | -1.925403 | -2.823915 | 2.296577  | 1  | -2.266759 | 3.596042  | 0.181122  |
| 1     | -3.338988 | -2.767704 | 1.244075  | 1  | -3.779097 | 2.682924  | 0.323806  |
| 6     | -1.226765 | 2.928392  | 1.349916  | 6  | -0.394815 | -0.551799 | -3.468661 |
| 1     | -0.605464 | 3.399103  | 0.574916  | 1  | 0.182467  | -1.475680 | -3.303179 |
| 1     | -2.159612 | 3.507333  | 1.379923  | 1  | -1.204484 | -0.812286 | -4.171418 |
| 1     | -0.722953 | 3.086075  | 2.307965  | 1  | 0.261129  | 0.161830  | -3.985201 |
| 6     | -2.365211 | 1.799480  | -1.378603 | 6  | -2.191734 | -2.124960 | -1.375726 |
| 1     | -3.448593 | 1.964443  | -1.310735 | 1  | -3.173308 | -2.083696 | -1.875149 |
| 1     | -1.857487 | 2.762974  | -1.293667 | 1  | -1.482590 | -2.633747 | -2.037215 |
| 1     | -2.130304 | 1.376553  | -2.361584 | 1  | -2.283125 | -2.713122 | -0.453523 |
| 6     | -2.670704 | -1.051028 | -1.498076 | 6  | -3.210218 | -0.551769 | 0.837076  |
| 1     | -3.484868 | -0.582609 | -2.065532 | 1  | -3.987281 | -1.253711 | 0.497872  |
| 1     | -1.776231 | -1.088831 | -2.143890 | 1  | -2.533894 | -1.086154 | 1.526872  |
| 1     | -2.966193 | -2.077531 | -1.270925 | 1  | -3.703856 | 0.250684  | 1.396389  |
| 24    | 0.000000  | 0.000000  | 0.000000  | 24 | 0.000000  | 0.000000  | 0.000000  |

**Table S15.** Atomic coordinates of the optimized structures for the **Cr-p-144** complexes.

| M06-L |           |           | B3LYP*    |    |           |           |           |
|-------|-----------|-----------|-----------|----|-----------|-----------|-----------|
|       | X         | Y         | Z         |    | X         | Y         | Z         |
| 6     | 2.247760  | -0.274526 | 0.415868  | 6  | 2.281074  | -0.338238 | 0.511157  |
| 1     | 2.942027  | 0.512016  | 0.705663  | 1  | 2.998976  | 0.404658  | 0.863612  |
| 1     | -2.942027 | -0.512016 | 0.705663  | 1  | -2.998976 | -0.404658 | 0.863612  |
| 6     | -2.247760 | 0.274526  | 0.415868  | 6  | -2.281074 | 0.338238  | 0.511157  |
| 5     | 1.935299  | -0.691900 | -1.016857 | 5  | 2.042297  | -0.712279 | -0.956366 |
| 5     | -1.935299 | 0.691900  | -1.016857 | 5  | -2.042297 | 0.712279  | -0.956366 |
| 5     | -1.661969 | 1.310729  | 1.334575  | 5  | -1.651313 | 1.417051  | 1.352328  |
| 5     | 1.661969  | -1.310729 | 1.334575  | 5  | 1.651313  | -1.417051 | 1.352328  |
| 7     | 0.991488  | -1.798977 | -0.925951 | 7  | 1.053957  | -1.782474 | -0.954991 |
| 7     | 0.677499  | -2.037576 | 0.469275  | 7  | 0.656845  | -2.060228 | 0.425211  |
| 7     | -0.991488 | 1.798977  | -0.925951 | 7  | -1.053957 | 1.782474  | -0.954991 |
| 7     | -0.677499 | 2.037576  | 0.469275  | 7  | -0.656845 | 2.060228  | 0.425211  |
| 6     | -2.375469 | 0.153529  | -2.431267 | 6  | -2.649082 | 0.144160  | -2.309921 |
| 1     | -3.019751 | 0.879044  | -2.944079 | 1  | -3.414619 | 0.837017  | -2.696844 |
| 1     | -1.528090 | -0.028602 | -3.107658 | 1  | -1.911285 | 0.011831  | -3.116863 |
| 1     | -2.944834 | -0.778822 | -2.364919 | 1  | -3.151522 | -0.820516 | -2.152985 |
| 6     | -1.730620 | 1.642490  | 2.871046  | 6  | -1.746924 | 1.857197  | 2.872560  |
| 1     | -2.342006 | 0.918864  | 3.416640  | 1  | -2.346627 | 1.143179  | 3.452725  |
| 1     | -0.740677 | 1.653078  | 3.349060  | 1  | -0.768379 | 1.950933  | 3.370024  |
| 1     | -2.166135 | 2.634609  | 3.052115  | 1  | -2.239370 | 2.840697  | 2.960228  |
| 6     | 0.000000  | 3.275884  | 0.790265  | 6  | 0.000000  | 3.339680  | 0.670244  |
| 1     | -0.614401 | 4.148756  | 0.530849  | 1  | -0.660978 | 4.182973  | 0.411577  |
| 1     | 0.175928  | 3.284151  | 1.867850  | 1  | 0.231895  | 3.394881  | 1.739147  |
| 1     | 0.968978  | 3.360888  | 0.286284  | 1  | 0.939193  | 3.434957  | 0.110190  |
| 6     | -0.131560 | 2.402689  | -1.911846 | 6  | -0.274501 | 2.371192  | -2.027164 |
| 1     | -0.215425 | 3.497687  | -1.923657 | 1  | -0.352670 | 3.469543  | -2.045580 |
| 1     | 0.928768  | 2.138334  | -1.774425 | 1  | 0.792227  | 2.097550  | -1.985659 |
| 1     | -0.445428 | 2.031113  | -2.890000 | 1  | -0.685347 | 1.992098  | -2.969653 |
| 6     | 2.375469  | -0.153529 | -2.431267 | 6  | 2.649082  | -0.144160 | -2.309921 |
| 1     | 1.528090  | 0.028602  | -3.107658 | 1  | 1.911285  | -0.011831 | -3.116863 |
| 1     | 2.944834  | 0.778822  | -2.364919 | 1  | 3.151522  | 0.820516  | -2.152985 |
| 1     | 3.019751  | -0.879044 | -2.944079 | 1  | 3.414619  | -0.837017 | -2.696844 |
| 6     | 1.730620  | -1.642490 | 2.871046  | 6  | 1.746924  | -1.857197 | 2.872560  |
| 1     | 0.740677  | -1.653078 | 3.349060  | 1  | 0.768379  | -1.950933 | 3.370024  |
| 1     | 2.166135  | -2.634609 | 3.052115  | 1  | 2.239370  | -2.840697 | 2.960228  |
| 1     | 2.342006  | -0.918864 | 3.416640  | 1  | 2.346627  | -1.143179 | 3.452725  |
| 6     | 0.000000  | -3.275884 | 0.790265  | 6  | 0.000000  | -3.339680 | 0.670244  |
| 1     | 0.614401  | -4.148756 | 0.530849  | 1  | 0.660978  | -4.182973 | 0.411577  |
| 1     | -0.175928 | -3.284151 | 1.867850  | 1  | -0.231895 | -3.394881 | 1.739147  |
| 1     | -0.968978 | -3.360888 | 0.286284  | 1  | -0.939193 | -3.434957 | 0.110190  |
| 6     | 0.131560  | -2.402689 | -1.911846 | 6  | 0.274501  | -2.371192 | -2.027164 |
| 1     | 0.215425  | -3.497687 | -1.923657 | 1  | 0.352670  | -3.469543 | -2.045580 |
| 1     | -0.928768 | -2.138334 | -1.774425 | 1  | -0.792227 | -2.097550 | -1.985659 |
| 1     | 0.445428  | -2.031113 | -2.890000 | 1  | 0.685347  | -1.992098 | -2.969653 |
| 24    | 0.000000  | 0.000000  | 0.416668  | 24 | 0.000000  | 0.000000  | 0.457289  |

**Table S16.** Atomic coordinates of the optimized structures for the **Cr-t-180** complexes.

| M06-L |           |           | B3LYP*    |    |           |           |           |
|-------|-----------|-----------|-----------|----|-----------|-----------|-----------|
| X     | Y         | Z         | X         | Y  | Z         |           |           |
| 6     | -0.864709 | 1.428821  | -1.566678 | 6  | -0.916396 | 1.427931  | -1.613027 |
| 1     | -0.335244 | 2.293953  | -1.963560 | 1  | -0.429535 | 2.304911  | -2.044407 |
| 1     | 0.335244  | -2.293953 | 1.963560  | 1  | 0.429535  | -2.304911 | 2.044407  |
| 6     | 0.864709  | -1.428821 | 1.566678  | 6  | 0.916396  | -1.427931 | 1.613027  |
| 5     | -1.728415 | 1.442636  | -0.341599 | 5  | -1.776150 | 1.436767  | -0.374550 |
| 5     | 0.788282  | -0.044281 | 2.136020  | 5  | 0.872056  | -0.042051 | 2.194283  |
| 5     | 1.728415  | -1.442636 | 0.341599  | 5  | 1.776150  | -1.436767 | 0.374550  |
| 5     | -0.788282 | 0.044281  | -2.136020 | 5  | -0.872056 | 0.042051  | -2.194283 |
| 7     | -2.052715 | -0.004346 | -0.080012 | 7  | -2.060974 | -0.012590 | -0.089995 |
| 7     | -1.500045 | -0.826279 | -1.134552 | 7  | -1.511224 | -0.837558 | -1.160257 |
| 7     | 1.500045  | 0.826279  | 1.134552  | 7  | 1.511224  | 0.837558  | 1.160257  |
| 7     | 2.052715  | 0.004346  | 0.080012  | 7  | 2.060974  | 0.012590  | 0.089995  |
| 6     | 0.110099  | 0.632180  | 3.385256  | 6  | 0.260736  | 0.601519  | 3.509708  |
| 1     | 0.837937  | 0.824771  | 4.184753  | 1  | 1.060496  | 0.890535  | 4.212151  |
| 1     | -0.361638 | 1.598687  | 3.159589  | 1  | -0.338586 | 1.507394  | 3.323688  |
| 1     | -0.662795 | -0.011540 | 3.817628  | 1  | -0.380889 | -0.117813 | 4.036674  |
| 6     | 2.237342  | -2.531254 | -0.675251 | 6  | 2.350667  | -2.567512 | -0.580958 |
| 1     | 1.652660  | -3.453734 | -0.598928 | 1  | 1.823179  | -3.518056 | -0.420224 |
| 1     | 2.194916  | -2.206133 | -1.724124 | 1  | 2.282085  | -2.328498 | -1.654247 |
| 1     | 3.282281  | -2.807882 | -0.481329 | 1  | 3.415932  | -2.756275 | -0.365549 |
| 6     | 2.954788  | 0.606023  | -0.877511 | 6  | 3.039313  | 0.591150  | -0.820686 |
| 1     | 3.903585  | 0.900071  | -0.410015 | 1  | 3.987269  | 0.813836  | -0.305431 |
| 1     | 3.165183  | -0.152767 | -1.634229 | 1  | 3.236005  | -0.158834 | -1.593929 |
| 1     | 2.512889  | 1.473571  | -1.380506 | 1  | 2.667265  | 1.499457  | -1.311235 |
| 6     | 1.867943  | 2.223797  | 1.199257  | 6  | 1.925186  | 2.229687  | 1.266224  |
| 1     | 2.927821  | 2.351622  | 1.455295  | 1  | 2.989755  | 2.315880  | 1.536294  |
| 1     | 1.652365  | 2.756676  | 0.266271  | 1  | 1.734654  | 2.791199  | 0.342934  |
| 1     | 1.266369  | 2.673159  | 1.992228  | 1  | 1.328898  | 2.678693  | 2.067419  |
| 6     | -2.237342 | 2.531254  | 0.675251  | 6  | -2.350667 | 2.567512  | 0.580958  |
| 1     | -2.194916 | 2.206133  | 1.724124  | 1  | -2.282085 | 2.328498  | 1.654247  |
| 1     | -1.652660 | 3.453734  | 0.598928  | 1  | -1.823179 | 3.518056  | 0.420224  |
| 1     | -3.282281 | 2.807882  | 0.481329  | 1  | -3.415932 | 2.756275  | 0.365549  |
| 6     | -0.110099 | -0.632180 | -3.385256 | 6  | -0.260736 | -0.601519 | -3.509708 |
| 1     | 0.361638  | -1.598687 | -3.159589 | 1  | 0.338586  | -1.507394 | -3.323688 |
| 1     | -0.837937 | -0.824771 | -4.184753 | 1  | -1.060496 | -0.890535 | -4.212151 |
| 1     | 0.662795  | 0.011540  | -3.817628 | 1  | 0.380889  | 0.117813  | -4.036674 |
| 6     | -1.867943 | -2.223797 | -1.199257 | 6  | -1.925186 | -2.229687 | -1.266224 |
| 1     | -2.927821 | -2.351622 | -1.455295 | 1  | -2.989755 | -2.315880 | -1.536294 |
| 1     | -1.266369 | -2.673159 | -1.992228 | 1  | -1.328898 | -2.678693 | -2.067419 |
| 1     | -1.652365 | -2.756676 | -0.266271 | 1  | -1.734654 | -2.791199 | -0.342934 |
| 6     | -2.954788 | -0.606023 | 0.877511  | 6  | -3.039313 | -0.591150 | 0.820686  |
| 1     | -3.903585 | -0.900071 | 0.410015  | 1  | -3.987269 | -0.813836 | 0.305431  |
| 1     | -2.512889 | -1.473571 | 1.380506  | 1  | -2.667265 | -1.499457 | 1.311235  |
| 1     | -3.165183 | 0.152767  | 1.634229  | 1  | -3.236005 | 0.158834  | 1.593929  |
| 24    | 0.000000  | 0.000000  | 0.000000  | 24 | 0.000000  | 0.000000  | 0.000000  |

**Table S17.** Atomic coordinates of the optimized structures for the **Cr-p-36** complexes.

| M06-L |           |           | B3LYP*    |    |           |           |           |
|-------|-----------|-----------|-----------|----|-----------|-----------|-----------|
| X     | Y         | Z         | X         | Y  | Z         |           |           |
| 6     | -0.656189 | 1.776890  | 1.575834  | 6  | 1.709591  | -0.853054 | -1.556033 |
| 1     | -0.933032 | 1.683642  | 2.623084  | 1  | 1.577066  | -1.154730 | -2.595955 |
| 1     | 0.933032  | -1.683642 | 2.623084  | 1  | -1.577075 | 1.154735  | -2.595962 |
| 6     | 0.656189  | -1.776890 | 1.575834  | 6  | -1.709598 | 0.853057  | -1.556040 |
| 5     | -1.597829 | 1.706466  | 0.405773  | 5  | 1.592170  | -1.753587 | -0.353225 |
| 5     | 1.597829  | -1.706466 | 0.405773  | 5  | -1.592207 | 1.753594  | -0.353232 |
| 5     | -0.697499 | -2.246012 | 1.057231  | 5  | -2.393809 | -0.437746 | -1.088637 |
| 5     | 0.697499  | 2.246012  | 1.057231  | 5  | 2.393837  | 0.437728  | -1.088626 |
| 7     | -0.697499 | 1.719064  | -0.785851 | 7  | 1.713625  | -0.819204 | 0.813583  |
| 7     | 0.595956  | 2.253196  | -0.405914 | 7  | 2.407940  | 0.388723  | 0.371526  |
| 7     | 0.697499  | -1.719064 | -0.785851 | 7  | -1.713644 | 0.819209  | 0.813575  |
| 7     | -0.595956 | -2.253196 | -0.405914 | 7  | -2.407914 | -0.388742 | 0.371515  |
| 6     | 3.143113  | -1.485933 | 0.205900  | 6  | -1.281990 | 3.293762  | -0.135169 |
| 1     | 3.623024  | -2.374898 | -0.225286 | 1  | -2.186238 | 3.823419  | 0.210071  |
| 1     | 3.377053  | -0.655281 | -0.476483 | 1  | -0.498262 | 3.494053  | 0.613538  |
| 1     | 3.649584  | -1.275718 | 1.151586  | 1  | -0.970585 | 3.768401  | -1.075082 |
| 6     | -2.071079 | -2.588426 | 1.744961  | 6  | -2.971134 | -1.691011 | -1.870993 |
| 1     | -1.972500 | -2.707509 | 2.826970  | 1  | -2.905757 | -1.547232 | -2.957498 |
| 1     | -2.811223 | -1.791300 | 1.583394  | 1  | -2.429780 | -2.621138 | -1.632475 |
| 1     | -2.521131 | -3.508671 | 1.351495  | 1  | -4.030631 | -1.868688 | -1.624525 |
| 6     | -1.650460 | -2.146643 | -1.384030 | 6  | -2.574938 | -1.462746 | 1.331615  |
| 1     | -1.476410 | -2.782929 | -2.261620 | 1  | -3.240075 | -1.183427 | 2.163333  |
| 1     | -2.575623 | -2.474411 | -0.904849 | 1  | -3.035911 | -2.302174 | 0.799331  |
| 1     | -1.802829 | -1.110528 | -1.740894 | 1  | -1.618449 | -1.815585 | 1.760355  |
| 6     | 1.103974  | -1.948328 | -2.155805 | 6  | -1.988355 | 1.245635  | 2.180876  |
| 1     | 1.137621  | -3.021658 | -2.387245 | 1  | -3.064144 | 1.435261  | 2.329337  |
| 1     | 0.438333  | -1.457920 | -2.877509 | 1  | -1.656182 | 0.505878  | 2.922309  |
| 1     | 2.108448  | -1.536616 | -2.281122 | 1  | -1.444362 | 2.179891  | 2.358641  |
| 6     | -3.143113 | 1.485933  | 0.205900  | 6  | 1.281918  | -3.293748 | -0.135163 |
| 1     | -3.377053 | 0.655281  | -0.476483 | 1  | 0.498189  | -3.494024 | 0.613549  |
| 1     | -3.649584 | 1.275718  | 1.151586  | 1  | 0.970499  | -3.768379 | -1.075075 |
| 1     | -3.623024 | 2.374898  | -0.225286 | 1  | 2.186155  | -3.823426 | 0.210073  |
| 6     | 2.071079  | 2.588426  | 1.744961  | 6  | 2.971199  | 1.690977  | -1.870980 |
| 1     | 2.811223  | 1.791300  | 1.583394  | 1  | 2.429822  | 2.621104  | -1.632511 |
| 1     | 2.521131  | 3.508671  | 1.351495  | 1  | 4.030681  | 1.868671  | -1.624461 |
| 1     | 1.972500  | 2.707509  | 2.826970  | 1  | 2.905878  | 1.547175  | -2.957485 |
| 6     | 1.650460  | 2.146643  | -1.384030 | 6  | 2.574975  | 1.462728  | 1.331623  |
| 1     | 1.476410  | 2.782929  | -2.261620 | 1  | 3.240095  | 1.183397  | 2.163352  |
| 1     | 2.575623  | 2.474411  | -0.904849 | 1  | 3.035974  | 2.302144  | 0.799343  |
| 1     | 1.802829  | 1.110528  | -1.740894 | 1  | 1.618488  | 1.815591  | 1.760350  |
| 6     | -1.103974 | 1.948328  | -2.155805 | 6  | 1.988323  | -1.245640 | 2.180883  |
| 1     | -1.137621 | 3.021658  | -2.387245 | 1  | 3.064104  | -1.435324 | 2.329337  |
| 1     | -0.438333 | 1.457920  | -2.877509 | 1  | 1.656197  | -0.505862 | 2.922316  |
| 1     | -2.108448 | 1.536616  | -2.281122 | 1  | 1.444280  | -2.179867 | 2.358657  |
| 24    | 0.000000  | 0.000000  | 0.393720  | 24 | 0.000003  | 0.000022  | -0.338307 |

**Table S18.** Atomic coordinates of the optimized structures for the Cr-t-72 complexes.

| M06-L |           |           | B3LYP*    |    |           |           |           |
|-------|-----------|-----------|-----------|----|-----------|-----------|-----------|
| X     | Y         | Z         | X         | Y  | Z         |           |           |
| 6     | 0.479641  | 1.806934  | 1.442007  | 6  | 0.459664  | 1.877474  | 1.422899  |
| 1     | -0.034648 | 2.026226  | 2.375021  | 1  | -0.051936 | 2.131501  | 2.352343  |
| 1     | 0.034648  | -2.026226 | 2.375021  | 1  | 0.051936  | -2.131501 | 2.352343  |
| 6     | -0.479641 | -1.806934 | 1.442007  | 6  | -0.459664 | -1.877474 | 1.422899  |
| 5     | 0.000000  | 2.219260  | 0.072910  | 5  | 0.000000  | 2.279577  | 0.039788  |
| 5     | 0.000000  | -2.219260 | 0.072910  | 5  | 0.000000  | -2.279577 | 0.039788  |
| 5     | -1.746385 | -1.018811 | 1.340063  | 5  | -1.755724 | -1.123409 | 1.336731  |
| 5     | 1.746385  | 1.018811  | 1.340063  | 5  | 1.755724  | 1.123409  | 1.336731  |
| 7     | 0.921148  | 1.495720  | -0.879972 | 7  | 0.908669  | 1.525037  | -0.894049 |
| 7     | 1.917816  | 0.763518  | -0.128615 | 7  | 1.922041  | 0.811209  | -0.120752 |
| 7     | -0.921148 | -1.495720 | -0.879972 | 7  | -0.908669 | -1.525037 | -0.894049 |
| 7     | -1.917816 | -0.763518 | -0.128615 | 7  | -1.922041 | -0.811209 | -0.120752 |
| 6     | 1.133577  | -3.149579 | -0.504432 | 6  | 1.109907  | -3.263239 | -0.531399 |
| 1     | 0.761595  | -4.159357 | -0.724605 | 1  | 0.668876  | -4.236577 | -0.805455 |
| 1     | 1.586614  | -2.781051 | -1.437260 | 1  | 1.635542  | -2.890753 | -1.426111 |
| 1     | 1.947957  | -3.270889 | 0.217590  | 1  | 1.871904  | -3.467850 | 0.233413  |
| 6     | -2.731038 | -0.306508 | 2.335453  | 6  | -2.786751 | -0.539810 | 2.387357  |
| 1     | -2.373643 | -0.367839 | 3.366604  | 1  | -2.420222 | -0.681712 | 3.412551  |
| 1     | -2.858058 | 0.760657  | 2.103099  | 1  | -2.975386 | 0.537307  | 2.251594  |
| 1     | -3.734478 | -0.752115 | 2.313316  | 1  | -3.762514 | -1.049171 | 2.315530  |
| 6     | -2.986414 | -0.103196 | -0.842855 | 6  | -3.076412 | -0.248117 | -0.804500 |
| 1     | -3.677098 | -0.822203 | -1.303047 | 1  | -3.745054 | -1.032578 | -1.194116 |
| 1     | -3.538945 | 0.489542  | -0.110968 | 1  | -3.627522 | 0.339186  | -0.062509 |
| 1     | -2.615095 | 0.581421  | -1.616505 | 1  | -2.792762 | 0.425093  | -1.624620 |
| 6     | -1.104461 | -1.660531 | -2.303185 | 6  | -1.133364 | -1.743091 | -2.314861 |
| 1     | -1.959052 | -2.311179 | -2.530015 | 1  | -2.002603 | -2.396165 | -2.490289 |
| 1     | -1.238850 | -0.706514 | -2.828804 | 1  | -1.273422 | -0.806982 | -2.873714 |
| 1     | -0.200979 | -2.139628 | -2.688658 | 1  | -0.244492 | -2.249903 | -2.706335 |
| 6     | -1.133577 | 3.149579  | -0.504432 | 6  | -1.109907 | 3.263239  | -0.531399 |
| 1     | -1.586614 | 2.781051  | -1.437260 | 1  | -1.635542 | 2.890753  | -1.426111 |
| 1     | -1.947957 | 3.270889  | 0.217590  | 1  | -1.871904 | 3.467850  | 0.233413  |
| 1     | -0.761595 | 4.159357  | -0.724605 | 1  | -0.668876 | 4.236577  | -0.805455 |
| 6     | 2.731038  | 0.306508  | 2.335453  | 6  | 2.786751  | 0.539810  | 2.387357  |
| 1     | 2.858058  | -0.760657 | 2.103099  | 1  | 2.975386  | -0.537307 | 2.251594  |
| 1     | 3.734478  | 0.752115  | 2.313316  | 1  | 3.762514  | 1.049171  | 2.315530  |
| 1     | 2.373643  | 0.367839  | 3.366604  | 1  | 2.420222  | 0.681712  | 3.412551  |
| 6     | 2.986414  | 0.103196  | -0.842855 | 6  | 3.076412  | 0.248117  | -0.804500 |
| 1     | 3.677098  | 0.822203  | -1.303047 | 1  | 3.745054  | 1.032578  | -1.194116 |
| 1     | 3.538945  | -0.489542 | -0.110968 | 1  | 3.627522  | -0.339186 | -0.062509 |
| 1     | 2.615095  | -0.581421 | -1.616505 | 1  | 2.792762  | -0.425093 | -1.624620 |
| 6     | 1.104461  | 1.660531  | -2.303185 | 6  | 1.133364  | 1.743091  | -2.314861 |
| 1     | 1.959052  | 2.311179  | -2.530015 | 1  | 2.002603  | 2.396165  | -2.490289 |
| 1     | 1.238850  | 0.706514  | -2.828804 | 1  | 1.273422  | 0.806982  | -2.873714 |
| 1     | 0.200979  | 2.139628  | -2.688658 | 1  | 0.244492  | 2.249903  | -2.706335 |
| 24    | 0.000000  | 0.000000  | 0.174796  | 24 | 0.000000  | 0.000000  | 0.156813  |

**Table S19.** Atomic coordinates of the optimized structures for the **Mn-x-144** complexes.

| M06-L |           |           | B3LYP*    |    |           |           |           |
|-------|-----------|-----------|-----------|----|-----------|-----------|-----------|
| X     | Y         | Z         | X         | Y  | Z         |           |           |
| 6     | 2.172261  | -0.280404 | 0.722179  | 6  | 2.149245  | -0.447693 | 0.624583  |
| 1     | 2.763700  | 0.485253  | 1.220260  | 1  | 2.806757  | 0.311721  | 1.052817  |
| 1     | -2.763700 | -0.485253 | 1.220260  | 1  | -2.806757 | -0.311721 | 1.052817  |
| 6     | -2.172261 | 0.280404  | 0.722179  | 6  | -2.149245 | 0.447693  | 0.624583  |
| 5     | 2.006142  | -0.435783 | -0.778095 | 5  | 1.964337  | -0.722797 | -0.866628 |
| 5     | -2.006142 | 0.435783  | -0.778095 | 5  | -1.964337 | 0.722797  | -0.866628 |
| 5     | -1.631028 | 1.552783  | 1.364282  | 5  | -1.607617 | 1.681158  | 1.360918  |
| 5     | 1.631028  | -1.552783 | 1.364282  | 5  | 1.607617  | -1.681158 | 1.360918  |
| 7     | 1.113149  | -1.592318 | -0.955841 | 7  | 1.041856  | -1.861303 | -0.945194 |
| 7     | 0.980766  | -2.296916 | 0.283860  | 7  | 0.901093  | -2.465049 | 0.354125  |
| 7     | -1.113149 | 1.592318  | -0.955841 | 7  | -1.041856 | 1.861303  | -0.945194 |
| 7     | -0.980766 | 2.296916  | 0.283860  | 7  | -0.901093 | 2.465049  | 0.354125  |
| 6     | -2.497357 | -0.380049 | -2.033192 | 6  | -2.524583 | 0.018745  | -2.176665 |
| 1     | -3.335275 | 0.127896  | -2.528700 | 1  | -3.282715 | 0.656312  | -2.661822 |
| 1     | -1.721941 | -0.506310 | -2.801579 | 1  | -1.754538 | -0.185714 | -2.937647 |
| 1     | -2.856312 | -1.378595 | -1.763362 | 1  | -3.017911 | -0.933787 | -1.939010 |
| 6     | -1.553089 | 2.088596  | 2.845067  | 6  | -1.642862 | 2.130933  | 2.885731  |
| 1     | -2.150137 | 1.482251  | 3.531502  | 1  | -2.188575 | 1.403565  | 3.501784  |
| 1     | -0.526134 | 2.089200  | 3.237058  | 1  | -0.641009 | 2.248094  | 3.329862  |
| 1     | -1.910599 | 3.122808  | 2.929650  | 1  | -2.153292 | 3.101202  | 3.001010  |
| 6     | 0.000000  | 3.352499  | 0.351199  | 6  | 0.000000  | 3.591087  | 0.507031  |
| 1     | -0.239933 | 4.189286  | -0.317321 | 1  | -0.307923 | 4.458109  | -0.097719 |
| 1     | 0.005919  | 3.728481  | 1.376162  | 1  | -0.028419 | 3.888004  | 1.560934  |
| 1     | 1.017454  | 3.002080  | 0.110056  | 1  | 1.043548  | 3.342347  | 0.250032  |
| 6     | -0.836453 | 2.326035  | -2.166674 | 6  | -0.723092 | 2.668314  | -2.108634 |
| 1     | -1.520175 | 3.177525  | -2.295344 | 1  | -1.380593 | 3.550663  | -2.192512 |
| 1     | 0.194338  | 2.699099  | -2.206196 | 1  | 0.322115  | 3.008709  | -2.110583 |
| 1     | -0.979593 | 1.643355  | -3.007470 | 1  | -0.876818 | 2.043648  | -2.995158 |
| 6     | 2.497357  | 0.380049  | -2.033192 | 6  | 2.524583  | -0.018745 | -2.176665 |
| 1     | 1.721941  | 0.506310  | -2.801579 | 1  | 1.754538  | 0.185714  | -2.937647 |
| 1     | 2.856312  | 1.378595  | -1.763362 | 1  | 3.017911  | 0.933787  | -1.939010 |
| 1     | 3.335275  | -0.127896 | -2.528700 | 1  | 3.282715  | -0.656312 | -2.661822 |
| 6     | 1.553089  | -2.088596 | 2.845067  | 6  | 1.642862  | -2.130933 | 2.885731  |
| 1     | 0.526134  | -2.089200 | 3.237058  | 1  | 0.641009  | -2.248094 | 3.329862  |
| 1     | 1.910599  | -3.122808 | 2.929650  | 1  | 2.153292  | -3.101202 | 3.001010  |
| 1     | 2.150137  | -1.482251 | 3.531502  | 1  | 2.188575  | -1.403565 | 3.501784  |
| 6     | 0.000000  | -3.352499 | 0.351199  | 6  | 0.000000  | -3.591087 | 0.507031  |
| 1     | 0.239933  | -4.189286 | -0.317321 | 1  | 0.307923  | -4.458109 | -0.097719 |
| 1     | -0.005919 | -3.728481 | 1.376162  | 1  | 0.028419  | -3.888004 | 1.560934  |
| 1     | -1.017454 | -3.002080 | 0.110056  | 1  | -1.043548 | -3.342347 | 0.250032  |
| 6     | 0.836453  | -2.326035 | -2.166674 | 6  | 0.723092  | -2.668314 | -2.108634 |
| 1     | 1.520175  | -3.177525 | -2.295344 | 1  | 1.380593  | -3.550663 | -2.192512 |
| 1     | -0.194338 | -2.699099 | -2.206196 | 1  | -0.322115 | -3.008709 | -2.110583 |
| 1     | 0.979593  | -1.643355 | -3.007470 | 1  | 0.876818  | -2.043648 | -2.995158 |
| 25    | 0.000000  | 0.000000  | 0.478140  | 25 | 0.000000  | 0.000000  | 0.440941  |



**Table S20.** Atomic coordinates of the optimized structures for the **Mn-d-180** complexes.

| M06-L |           |           | B3LYP*    |    |           |           |           |
|-------|-----------|-----------|-----------|----|-----------|-----------|-----------|
| X     | Y         | Z         | X         | Y  | Z         |           |           |
| 6     | 1.104816  | 0.327622  | -1.861616 | 6  | 1.236736  | -0.242334 | 1.853952  |
| 1     | 0.735060  | 0.174714  | -2.874879 | 1  | 0.905107  | -0.142436 | 2.889264  |
| 1     | -0.735060 | -0.174714 | 2.874879  | 1  | -0.905107 | 0.142436  | -2.889264 |
| 6     | -1.104816 | -0.327622 | 1.861616  | 6  | -1.236736 | 0.242334  | -1.853952 |
| 5     | 1.907988  | -0.664028 | -1.077701 | 5  | 1.931986  | 0.831394  | 1.060182  |
| 5     | -0.979514 | -1.613356 | 1.073068  | 5  | -1.247132 | 1.534403  | -1.057476 |
| 5     | -1.907988 | 0.664028  | 1.077701  | 5  | -1.931986 | -0.831394 | -1.060182 |
| 5     | 0.979514  | 1.613356  | -1.073068 | 5  | 1.247132  | -1.534403 | 1.057476  |
| 7     | 2.012592  | -0.073544 | 0.291762  | 7  | 2.012539  | 0.278927  | -0.323979 |
| 7     | 1.522854  | 1.274301  | 0.282666  | 7  | 1.657649  | -1.123272 | -0.316540 |
| 7     | -1.522854 | -1.274301 | -0.282666 | 7  | -1.657649 | 1.123272  | 0.316540  |
| 7     | -2.012592 | 0.073544  | -0.291762 | 7  | -2.012539 | -0.278927 | 0.323979  |
| 6     | -0.448068 | -3.065239 | 1.371932  | 6  | -0.920688 | 3.050463  | -1.397487 |
| 1     | -1.259091 | -3.733418 | 1.690686  | 1  | -1.848446 | 3.626055  | -1.554306 |
| 1     | 0.032901  | -3.549689 | 0.511456  | 1  | -0.349881 | 3.572890  | -0.613550 |
| 1     | 0.283037  | -3.059861 | 2.187707  | 1  | -0.343670 | 3.125044  | -2.329995 |
| 6     | -2.435708 | 2.126537  | 1.311518  | 6  | -2.406278 | -2.314326 | -1.353615 |
| 1     | -2.078311 | 2.540249  | 2.259199  | 1  | -2.105566 | -2.635771 | -2.359890 |
| 1     | -2.127593 | 2.819869  | 0.516266  | 1  | -2.001658 | -3.045736 | -0.635418 |
| 1     | -3.532627 | 2.163637  | 1.341283  | 1  | -3.504950 | -2.395648 | -1.302688 |
| 6     | -2.696113 | 0.565580  | -1.468910 | 6  | -2.682985 | -0.837209 | 1.490217  |
| 1     | -3.660429 | 0.061988  | -1.616453 | 1  | -3.706113 | -0.442077 | 1.594943  |
| 1     | -2.882306 | 1.629151  | -1.306770 | 1  | -2.743235 | -1.919591 | 1.336691  |
| 1     | -2.084988 | 0.460370  | -2.371452 | 1  | -2.121991 | -0.653298 | 2.414275  |
| 6     | -1.729319 | -2.102650 | -1.451635 | 6  | -1.996721 | 1.947726  | 1.467915  |
| 1     | -2.790707 | -2.347205 | -1.588440 | 1  | -3.087690 | 2.046148  | 1.584365  |
| 1     | -1.337031 | -1.637735 | -2.362438 | 1  | -1.558663 | 1.562377  | 2.397016  |
| 1     | -1.181328 | -3.031814 | -1.281846 | 1  | -1.580400 | 2.943025  | 1.280470  |
| 6     | 2.435708  | -2.126537 | -1.311518 | 6  | 2.406278  | 2.314326  | 1.353615  |
| 1     | 2.127593  | -2.819869 | -0.516266 | 1  | 2.001658  | 3.045736  | 0.635418  |
| 1     | 2.078311  | -2.540249 | -2.259199 | 1  | 2.105566  | 2.635771  | 2.359890  |
| 1     | 3.532627  | -2.163637 | -1.341283 | 1  | 3.504950  | 2.395648  | 1.302688  |
| 6     | 0.448068  | 3.065239  | -1.371932 | 6  | 0.920688  | -3.050463 | 1.397487  |
| 1     | -0.032901 | 3.549689  | -0.511456 | 1  | 0.349881  | -3.572890 | 0.613550  |
| 1     | 1.259091  | 3.733418  | -1.690686 | 1  | 1.848446  | -3.626055 | 1.554306  |
| 1     | -0.283037 | 3.059861  | -2.187707 | 1  | 0.343670  | -3.125044 | 2.329995  |
| 6     | 1.729319  | 2.102650  | 1.451635  | 6  | 1.996721  | -1.947726 | -1.467915 |
| 1     | 2.790707  | 2.347205  | 1.588440  | 1  | 3.087690  | -2.046148 | -1.584365 |
| 1     | 1.181328  | 3.031814  | 1.281846  | 1  | 1.580400  | -2.943025 | -1.280470 |
| 1     | 1.337031  | 1.637735  | 2.362438  | 1  | 1.558663  | -1.562377 | -2.397016 |
| 6     | 2.696113  | -0.565580 | 1.468910  | 6  | 2.682985  | 0.837209  | -1.490217 |
| 1     | 3.660429  | -0.061988 | 1.616453  | 1  | 3.706113  | 0.442077  | -1.594943 |
| 1     | 2.084988  | -0.460370 | 2.371452  | 1  | 2.121991  | 0.653298  | -2.414275 |
| 1     | 2.882306  | -1.629151 | 1.306770  | 1  | 2.743235  | 1.919591  | -1.336691 |
| 25    | 0.000000  | 0.000000  | 0.000000  | 25 | 0.000000  | 0.000000  | 0.000000  |

**Table S21.** Atomic coordinates of the optimized structures for the **Mn-q-180** complexes.

| M06-L |           |           | B3LYP*    |    |           |           |           |
|-------|-----------|-----------|-----------|----|-----------|-----------|-----------|
| X     | Y         | Z         | X         | Y  | Z         |           |           |
| 6     | 1.165688  | 0.197668  | -1.825806 | 6  | -1.263930 | 0.166726  | 1.797626  |
| 1     | 0.784011  | -0.030985 | -2.819490 | 1  | -0.927927 | -0.033547 | 2.816502  |
| 1     | -0.784011 | 0.030985  | 2.819490  | 1  | 0.927857  | 0.033579  | -2.816474 |
| 6     | -1.165688 | -0.197668 | 1.825806  | 6  | 1.263887  | -0.166706 | -1.797609 |
| 5     | 2.115236  | -0.690473 | -1.034375 | 5  | -2.220587 | -0.731294 | 0.999952  |
| 5     | -1.060339 | -1.530770 | 1.115380  | 5  | 1.196152  | -1.504103 | -1.086054 |
| 5     | -2.115236 | 0.690473  | 1.034375  | 5  | 2.220570  | 0.731301  | -0.999953 |
| 5     | 1.060339  | 1.530770  | -1.115380 | 5  | -1.196178 | 1.504115  | 1.086057  |
| 7     | 2.415055  | 0.019185  | 0.213448  | 7  | -2.469418 | -0.051747 | -0.267508 |
| 7     | 1.616548  | 1.228602  | 0.254869  | 7  | -1.673232 | 1.174745  | -0.306335 |
| 7     | -1.616548 | -1.228602 | -0.254869 | 7  | 1.673243  | -1.174749 | 0.306330  |
| 7     | -2.415055 | -0.019185 | -0.213448 | 7  | 2.469437  | 0.051739  | 0.267492  |
| 6     | -0.516894 | -2.968530 | 1.456288  | 6  | 0.737464  | -2.971721 | -1.480008 |
| 1     | -1.334237 | -3.650859 | 1.726644  | 1  | 1.614888  | -3.618539 | -1.649762 |
| 1     | 0.019943  | -3.448275 | 0.626683  | 1  | 0.120222  | -3.470721 | -0.716224 |
| 1     | 0.165668  | -2.948366 | 2.312124  | 1  | 0.163027  | -2.965026 | -2.416668 |
| 6     | -2.688125 | 2.137580  | 1.262190  | 6  | 2.849490  | 2.156382  | -1.298194 |
| 1     | -2.426640 | 2.538038  | 2.245510  | 1  | 2.609745  | 2.498042  | -2.313955 |
| 1     | -2.309095 | 2.848069  | 0.513869  | 1  | 2.485131  | 2.926304  | -0.597988 |
| 1     | -3.781712 | 2.166619  | 1.177773  | 1  | 3.947385  | 2.142758  | -1.205145 |
| 6     | -2.829928 | 0.526631  | -1.485627 | 6  | 2.953625  | 0.585745  | 1.528521  |
| 1     | -3.581512 | -0.101469 | -1.980872 | 1  | 3.702757  | -0.070640 | 1.997227  |
| 1     | -3.279080 | 1.502617  | -1.289749 | 1  | 3.436201  | 1.544368  | 1.307734  |
| 1     | -1.986157 | 0.671464  | -2.180042 | 1  | 2.143555  | 0.767692  | 2.254665  |
| 6     | -1.923762 | -2.183989 | -1.298698 | 6  | 2.031941  | -2.150988 | 1.328082  |
| 1     | -2.937889 | -2.586218 | -1.176423 | 1  | 3.067570  | -2.500137 | 1.187486  |
| 1     | -1.828133 | -1.745939 | -2.297728 | 1  | 1.920794  | -1.745092 | 2.341619  |
| 1     | -1.207719 | -3.004733 | -1.217082 | 1  | 1.355896  | -3.005901 | 1.224306  |
| 6     | 2.688125  | -2.137580 | -1.262190 | 6  | -2.849507 | -2.156378 | 1.298188  |
| 1     | 2.309095  | -2.848069 | -0.513869 | 1  | -2.485115 | -2.926302 | 0.598002  |
| 1     | 2.426640  | -2.538038 | -2.245510 | 1  | -2.609791 | -2.498023 | 2.313961  |
| 1     | 3.781712  | -2.166619 | -1.177773 | 1  | -3.947398 | -2.142766 | 1.205102  |
| 6     | 0.516894  | 2.968530  | -1.456288 | 6  | -0.737502 | 2.971738  | 1.480010  |
| 1     | -0.019943 | 3.448275  | -0.626683 | 1  | -0.120256 | 3.470741  | 0.716231  |
| 1     | 1.334237  | 3.650859  | -1.726644 | 1  | -1.614933 | 3.618549  | 1.649753  |
| 1     | -0.165668 | 2.948366  | -2.312124 | 1  | -0.163074 | 2.965050  | 2.416676  |
| 6     | 1.923762  | 2.183989  | 1.298698  | 6  | -2.031891 | 2.150966  | -1.328116 |
| 1     | 2.937889  | 2.586218  | 1.176423  | 1  | -3.067521 | 2.500121  | -1.187563 |
| 1     | 1.207719  | 3.004733  | 1.217082  | 1  | -1.355845 | 3.005878  | -1.224333 |
| 1     | 1.828133  | 1.745939  | 2.297728  | 1  | -1.920710 | 1.745050  | -2.341641 |
| 6     | 2.829928  | -0.526631 | 1.485627  | 6  | -2.953589 | -0.585760 | -1.528539 |
| 1     | 3.581512  | 0.101469  | 1.980872  | 1  | -3.702719 | 0.070620  | -1.997256 |
| 1     | 1.986157  | -0.671464 | 2.180042  | 1  | -2.143511 | -0.767706 | -2.254673 |
| 1     | 3.279080  | -1.502617 | 1.289749  | 1  | -3.436163 | -1.544384 | -1.307755 |
| 25    | 0.000000  | 0.000000  | 0.000000  | 25 | 0.000000  | 0.000000  | 0.000022  |

**Table S22.** Atomic coordinates of the optimized structures for the **Mn-q-36** complexes.

| M06-L |           |           | B3LYP*    |    |           |           |           |
|-------|-----------|-----------|-----------|----|-----------|-----------|-----------|
| X     | Y         | Z         | X         | Y  | Z         |           |           |
| 6     | 0.062386  | 1.721045  | 1.583867  | 6  | 0.906062  | -1.465499 | 1.583074  |
| 1     | -0.218863 | 1.664095  | 2.632184  | 1  | 1.078428  | -1.267883 | 2.641349  |
| 1     | 0.218863  | -1.664095 | 2.632184  | 1  | -1.078428 | 1.267883  | 2.641349  |
| 6     | -0.062386 | -1.721045 | 1.583867  | 6  | -0.906062 | 1.465499  | 1.583074  |
| 5     | -0.877559 | 1.984928  | 0.420612  | 5  | 1.872660  | -1.154999 | 0.450837  |
| 5     | 0.877559  | -1.984928 | 0.420612  | 5  | -1.872660 | 1.154999  | 0.450837  |
| 5     | -1.493993 | -1.787656 | 1.063787  | 5  | 0.164203  | 2.417292  | 1.024999  |
| 5     | 1.493993  | 1.787656  | 1.063787  | 5  | -0.164203 | -2.417292 | 1.024999  |
| 7     | 0.000000  | 1.786136  | -0.783336 | 7  | 1.080299  | -1.487748 | -0.782739 |
| 7     | 1.398306  | 1.869609  | -0.394216 | 7  | 0.000000  | -2.411294 | -0.424047 |
| 7     | 0.000000  | -1.786136 | -0.783336 | 7  | -1.080299 | 1.487748  | -0.782739 |
| 7     | -1.398306 | -1.869609 | -0.394216 | 7  | 0.000000  | 2.411294  | -0.424047 |
| 6     | 2.400768  | -2.342269 | 0.240409  | 6  | -3.354887 | 0.594382  | 0.364398  |
| 1     | 2.535513  | -3.391632 | -0.056225 | 1  | -4.067201 | 1.412908  | 0.164148  |
| 1     | 2.909345  | -1.740719 | -0.527463 | 1  | -3.510411 | -0.159286 | -0.424258 |
| 1     | 2.956571  | -2.205314 | 1.172397  | 1  | -3.653752 | 0.139218  | 1.318376  |
| 6     | -2.903789 | -1.663949 | 1.746744  | 6  | 1.335306  | 3.233075  | 1.712832  |
| 1     | -2.856546 | -1.826360 | 2.826538  | 1  | 1.198161  | 3.287464  | 2.800940  |
| 1     | -3.321304 | -0.657795 | 1.599350  | 1  | 2.313061  | 2.754859  | 1.535998  |
| 1     | -3.640190 | -2.366294 | 1.336912  | 1  | 1.410276  | 4.264159  | 1.332479  |
| 6     | -2.360491 | -1.452571 | -1.384303 | 6  | 0.962078  | 2.743706  | -1.457616 |
| 1     | -2.415422 | -2.144909 | -2.234540 | 1  | 0.514899  | 3.330681  | -2.274575 |
| 1     | -3.340004 | -1.424830 | -0.902128 | 1  | 1.743834  | 3.353631  | -0.991381 |
| 1     | -2.148540 | -0.442823 | -1.781123 | 1  | 1.440827  | 1.849569  | -1.896817 |
| 6     | 0.308314  | -2.181556 | -2.140212 | 6  | -1.654248 | 1.670996  | -2.109345 |
| 1     | 0.004944  | -3.220495 | -2.327226 | 1  | -2.059955 | 2.689458  | -2.224592 |
| 1     | -0.174304 | -1.536106 | -2.884882 | 1  | -0.923769 | 1.488708  | -2.909635 |
| 1     | 1.390781  | -2.109894 | -2.271523 | 1  | -2.476538 | 0.956168  | -2.222762 |
| 6     | -2.400768 | 2.342269  | 0.240409  | 6  | 3.354887  | -0.594382 | 0.364398  |
| 1     | -2.909345 | 1.740719  | -0.527463 | 1  | 3.510411  | 0.159286  | -0.424258 |
| 1     | -2.956571 | 2.205314  | 1.172397  | 1  | 3.653752  | -0.139218 | 1.318376  |
| 1     | -2.535513 | 3.391632  | -0.056225 | 1  | 4.067201  | -1.412908 | 0.164148  |
| 6     | 2.903789  | 1.663949  | 1.746744  | 6  | -1.335306 | -3.233075 | 1.712832  |
| 1     | 3.321304  | 0.657795  | 1.599350  | 1  | -2.313061 | -2.754859 | 1.535998  |
| 1     | 3.640190  | 2.366294  | 1.336912  | 1  | -1.410276 | -4.264159 | 1.332479  |
| 1     | 2.856546  | 1.826360  | 2.826538  | 1  | -1.198161 | -3.287464 | 2.800940  |
| 6     | 2.360491  | 1.452571  | -1.384303 | 6  | -0.962078 | -2.743706 | -1.457616 |
| 1     | 2.415422  | 2.144909  | -2.234540 | 1  | -0.514899 | -3.330681 | -2.274575 |
| 1     | 3.340004  | 1.424830  | -0.902128 | 1  | -1.743834 | -3.353631 | -0.991381 |
| 1     | 2.148540  | 0.442823  | -1.781123 | 1  | -1.440827 | -1.849569 | -1.896817 |
| 6     | -0.308314 | 2.181556  | -2.140212 | 6  | 1.654248  | -1.670996 | -2.109345 |
| 1     | -0.004944 | 3.220495  | -2.327226 | 1  | 2.059955  | -2.689458 | -2.224592 |
| 1     | 0.174304  | 1.536106  | -2.884882 | 1  | 0.923769  | -1.488708 | -2.909635 |
| 1     | -1.390781 | 2.109894  | -2.271523 | 1  | 2.476538  | -0.956168 | -2.222762 |
| 25    | 0.000000  | 0.000000  | 0.316754  | 25 | 0.000000  | 0.000000  | 0.292720  |

**Table S23.** Atomic coordinates of the optimized structures for the **Mn-q-144** complexes.

| M06-L |           |           | B3LYP*    |    |           |           |           |
|-------|-----------|-----------|-----------|----|-----------|-----------|-----------|
| X     | Y         | Z         | X         | Y  | Z         |           |           |
| 6     | 2.139740  | -0.075795 | 0.410555  | 6  | 2.244501  | -0.208689 | 0.519105  |
| 1     | 2.747704  | 0.785388  | 0.682630  | 1  | 2.931680  | 0.561893  | 0.871716  |
| 1     | -2.747704 | -0.785388 | 0.682630  | 1  | -2.931680 | -0.561893 | 0.871716  |
| 6     | -2.139740 | 0.075795  | 0.410555  | 6  | -2.244501 | 0.208689  | 0.519105  |
| 5     | 1.999861  | -0.642869 | -0.996916 | 5  | 2.012360  | -0.567147 | -0.950126 |
| 5     | -1.999861 | 0.642869  | -0.996916 | 5  | -2.012360 | 0.567147  | -0.950126 |
| 5     | -1.523391 | 1.064537  | 1.388801  | 5  | -1.632513 | 1.307267  | 1.350879  |
| 5     | 1.523391  | -1.064537 | 1.388801  | 5  | 1.632513  | -1.307267 | 1.350879  |
| 7     | 1.120311  | -1.805690 | -0.888544 | 7  | 1.022633  | -1.639395 | -0.955556 |
| 7     | 0.682595  | -1.930189 | 0.492948  | 7  | 0.677264  | -1.985722 | 0.419380  |
| 7     | -1.120311 | 1.805690  | -0.888544 | 7  | -1.022633 | 1.639395  | -0.955556 |
| 7     | -0.682595 | 1.930189  | 0.492948  | 7  | -0.677264 | 1.985722  | 0.419380  |
| 6     | -2.491514 | 0.173124  | -2.417459 | 6  | -2.614852 | -0.011812 | -2.299798 |
| 1     | -3.079228 | 0.949495  | -2.923091 | 1  | -3.410942 | 0.656122  | -2.668830 |
| 1     | -1.653116 | -0.056518 | -3.092224 | 1  | -1.884522 | -0.110362 | -3.117949 |
| 1     | -3.117348 | -0.722616 | -2.367152 | 1  | -3.080764 | -0.994791 | -2.143720 |
| 6     | -1.575323 | 1.321512  | 2.938769  | 6  | -1.675131 | 1.707284  | 2.886996  |
| 1     | -1.974931 | 0.454816  | 3.473969  | 1  | -2.265995 | 0.984001  | 3.464834  |
| 1     | -0.590932 | 1.538099  | 3.374577  | 1  | -0.679491 | 1.770243  | 3.355633  |
| 1     | -2.221931 | 2.173925  | 3.189250  | 1  | -2.148474 | 2.694486  | 3.021977  |
| 6     | 0.000000  | 3.151477  | 0.859742  | 6  | 0.000000  | 3.255447  | 0.646540  |
| 1     | -0.663557 | 4.020683  | 0.759015  | 1  | -0.640435 | 4.108982  | 0.369960  |
| 1     | 0.297799  | 3.058478  | 1.906034  | 1  | 0.219028  | 3.320584  | 1.717515  |
| 1     | 0.902214  | 3.318080  | 0.261533  | 1  | 0.948685  | 3.318937  | 0.099214  |
| 6     | -0.308153 | 2.448407  | -1.894261 | 6  | -0.356170 | 2.333542  | -2.039900 |
| 1     | -0.362943 | 3.543060  | -1.833963 | 1  | -0.593901 | 3.409148  | -2.054504 |
| 1     | 0.752129  | 2.153276  | -1.840348 | 1  | 0.737028  | 2.213169  | -2.014329 |
| 1     | -0.694728 | 2.143357  | -2.869292 | 1  | -0.723780 | 1.896652  | -2.975016 |
| 6     | 2.491514  | -0.173124 | -2.417459 | 6  | 2.614852  | 0.011812  | -2.299798 |
| 1     | 1.653116  | 0.056518  | -3.092224 | 1  | 1.884522  | 0.110362  | -3.117949 |
| 1     | 3.117348  | 0.722616  | -2.367152 | 1  | 3.080764  | 0.994791  | -2.143720 |
| 1     | 3.079228  | -0.949495 | -2.923091 | 1  | 3.410942  | -0.656122 | -2.668830 |
| 6     | 1.575323  | -1.321512 | 2.938769  | 6  | 1.675131  | -1.707284 | 2.886996  |
| 1     | 0.590932  | -1.538099 | 3.374577  | 1  | 0.679491  | -1.770243 | 3.355633  |
| 1     | 2.221931  | -2.173925 | 3.189250  | 1  | 2.148474  | -2.694486 | 3.021977  |
| 1     | 1.974931  | -0.454816 | 3.473969  | 1  | 2.265995  | -0.984001 | 3.464834  |
| 6     | 0.000000  | -3.151477 | 0.859742  | 6  | 0.000000  | -3.255447 | 0.646540  |
| 1     | 0.663557  | -4.020683 | 0.759015  | 1  | 0.640435  | -4.108982 | 0.369960  |
| 1     | -0.297799 | -3.058478 | 1.906034  | 1  | -0.219028 | -3.320584 | 1.717515  |
| 1     | -0.902214 | -3.318080 | 0.261533  | 1  | -0.948685 | -3.318937 | 0.099214  |
| 6     | 0.308153  | -2.448407 | -1.894261 | 6  | 0.356170  | -2.333542 | -2.039900 |
| 1     | 0.362943  | -3.543060 | -1.833963 | 1  | 0.593901  | -3.409148 | -2.054504 |
| 1     | -0.752129 | -2.153276 | -1.840348 | 1  | -0.737028 | -2.213169 | -2.014329 |
| 1     | 0.694728  | -2.143357 | -2.869292 | 1  | 0.723780  | -1.896652 | -2.975016 |
| 25    | 0.000000  | 0.000000  | 0.216378  | 25 | 0.000000  | 0.000000  | 0.443625  |

**Table S24.** Atomic coordinates of the optimized structures for the Fe-s-180 complexes.

| M06-L |           |           | B3LYP*    |    |           |           |           |
|-------|-----------|-----------|-----------|----|-----------|-----------|-----------|
| X     | Y         | Z         | X         | Y  | Z         |           |           |
| 6     | 1.622910  | -1.403028 | 0.000007  | 6  | -1.630445 | 1.481467  | 0.000012  |
| 1     | 1.525423  | -2.488326 | 0.000011  | 1  | -1.523483 | 2.568045  | 0.000019  |
| 1     | -1.525423 | 2.488326  | 0.000011  | 1  | 1.523483  | -2.568045 | 0.000019  |
| 6     | -1.622910 | 1.403028  | 0.000007  | 6  | 1.630445  | -1.481467 | 0.000012  |
| 5     | 1.695048  | -0.544136 | 1.232896  | 5  | -1.754646 | 0.621282  | 1.233499  |
| 5     | -1.695048 | 0.544136  | 1.232896  | 5  | 1.754646  | -0.621282 | 1.233499  |
| 5     | -1.695050 | 0.544146  | -1.232889 | 5  | 1.754643  | -0.621301 | -1.233489 |
| 5     | 1.695050  | -0.544146 | -1.232889 | 5  | -1.754643 | 0.621301  | -1.233489 |
| 7     | 1.622910  | 0.863020  | 0.718076  | 7  | -1.680087 | -0.783038 | 0.723447  |
| 7     | 1.622911  | 0.863014  | -0.718080 | 7  | -1.680083 | -0.783028 | -0.723456 |
| 7     | -1.622910 | -0.863020 | 0.718076  | 7  | 1.680087  | 0.783038  | 0.723447  |
| 7     | -1.622911 | -0.863014 | -0.718080 | 7  | 1.680083  | 0.783028  | -0.723456 |
| 6     | -1.750514 | 0.803257  | 2.783292  | 6  | 1.867946  | -0.911091 | 2.788499  |
| 1     | -2.783939 | 0.785055  | 3.153351  | 1  | 2.913024  | -0.811282 | 3.126524  |
| 1     | -1.192846 | 0.067982  | 3.378224  | 1  | 1.263855  | -0.236192 | 3.414546  |
| 1     | -1.352620 | 1.792244  | 3.035377  | 1  | 1.560637  | -1.941009 | 3.017859  |
| 6     | -1.750518 | 0.803277  | -2.783283 | 6  | 1.867945  | -0.911128 | -2.788485 |
| 1     | -1.352639 | 1.792273  | -3.035361 | 1  | 1.560655  | -1.941054 | -3.017833 |
| 1     | -1.192836 | 0.068015  | -3.378219 | 1  | 1.263840  | -0.236246 | -3.414537 |
| 1     | -2.783941 | 0.785060  | -3.153345 | 1  | 2.913020  | -0.811302 | -3.126513 |
| 6     | -1.672384 | -2.127681 | -1.418855 | 6  | 1.867946  | 2.038218  | -1.435784 |
| 1     | -2.644549 | -2.619352 | -1.287153 | 1  | 2.889366  | 2.426648  | -1.297777 |
| 1     | -1.535946 | -1.908786 | -2.479635 | 1  | 1.719252  | 1.826756  | -2.499560 |
| 1     | -0.870207 | -2.803413 | -1.103505 | 1  | 1.137974  | 2.797807  | -1.131607 |
| 6     | -1.672381 | -2.127693 | 1.418840  | 6  | 1.867945  | 2.038241  | 1.435754  |
| 1     | -2.644543 | -2.619367 | 1.287130  | 1  | 2.889357  | 2.426681  | 1.297726  |
| 1     | -0.870199 | -2.803418 | 1.103488  | 1  | 1.137958  | 2.797816  | 1.131578  |
| 1     | -1.535948 | -1.908805 | 2.479622  | 1  | 1.719270  | 1.826793  | 2.499536  |
| 6     | 1.750514  | -0.803257 | 2.783292  | 6  | -1.867946 | 0.911091  | 2.788499  |
| 1     | 1.192846  | -0.067982 | 3.378224  | 1  | -1.263855 | 0.236192  | 3.414546  |
| 1     | 1.352620  | -1.792244 | 3.035377  | 1  | -1.560637 | 1.941009  | 3.017859  |
| 1     | 2.783939  | -0.785055 | 3.153351  | 1  | -2.913024 | 0.811282  | 3.126524  |
| 6     | 1.750518  | -0.803277 | -2.783283 | 6  | -1.867945 | 0.911128  | -2.788485 |
| 1     | 1.192836  | -0.068015 | -3.378219 | 1  | -1.263840 | 0.236246  | -3.414537 |
| 1     | 2.783941  | -0.785060 | -3.153345 | 1  | -2.913020 | 0.811302  | -3.126513 |
| 1     | 1.352639  | -1.792273 | -3.035361 | 1  | -1.560655 | 1.941054  | -3.017833 |
| 6     | 1.672384  | 2.127681  | -1.418855 | 6  | -1.867946 | -2.038218 | -1.435784 |
| 1     | 2.644549  | 2.619352  | -1.287153 | 1  | -2.889366 | -2.426648 | -1.297777 |
| 1     | 1.535946  | 1.908786  | -2.479635 | 1  | -1.719252 | -1.826756 | -2.499560 |
| 1     | 0.870207  | 2.803413  | -1.103505 | 1  | -1.137974 | -2.797807 | -1.131607 |
| 6     | 1.672381  | 2.127693  | 1.418840  | 6  | -1.867945 | -2.038241 | 1.435754  |
| 1     | 2.644543  | 2.619367  | 1.287130  | 1  | -2.889357 | -2.426681 | 1.297726  |
| 1     | 0.870199  | 2.803418  | 1.103488  | 1  | -1.137958 | -2.797816 | 1.131578  |
| 1     | 1.535948  | 1.908805  | 2.479622  | 1  | -1.719270 | -1.826793 | 2.499536  |
| 26    | 0.000000  | 0.000000  | 0.000000  | 26 | 0.000000  | 0.000000  | 0.000006  |

**Table S25.** Atomic coordinates of the optimized structures for the Fe-s-72 complexes.

| M06-L |           |           | B3LYP*    |    |           |           |           |
|-------|-----------|-----------|-----------|----|-----------|-----------|-----------|
| X     | Y         | Z         | X         | Y  | Z         |           |           |
| 6     | 0.414261  | 1.678920  | 1.439442  | 6  | 0.378146  | 1.755346  | 1.407716  |
| 1     | -0.118502 | 1.877982  | 2.366027  | 1  | -0.160849 | 1.988657  | 2.326278  |
| 1     | 0.118502  | -1.877982 | 2.366027  | 1  | 0.160849  | -1.988657 | 2.326278  |
| 6     | -0.414261 | -1.678920 | 1.439442  | 6  | -0.378146 | -1.755346 | 1.407716  |
| 5     | 0.000000  | 2.174694  | 0.084380  | 5  | 0.000000  | 2.236801  | 0.030449  |
| 5     | 0.000000  | -2.174694 | 0.084380  | 5  | 0.000000  | -2.236801 | 0.030449  |
| 5     | -1.635660 | -0.805534 | 1.329472  | 5  | -1.637432 | -0.925487 | 1.337778  |
| 5     | 1.635660  | 0.805534  | 1.329472  | 5  | 1.637432  | 0.925487  | 1.337778  |
| 7     | 0.882386  | 1.437276  | -0.877371 | 7  | 0.882382  | 1.463947  | -0.895439 |
| 7     | 1.835174  | 0.638010  | -0.151661 | 7  | 1.840299  | 0.689032  | -0.129237 |
| 7     | -0.882386 | -1.437276 | -0.877371 | 7  | -0.882382 | -1.463947 | -0.895439 |
| 7     | -1.835174 | -0.638010 | -0.151661 | 7  | -1.840299 | -0.689032 | -0.129237 |
| 6     | 1.106682  | -3.146114 | -0.472094 | 6  | 1.082732  | -3.245579 | -0.542372 |
| 1     | 0.702110  | -4.150894 | -0.650885 | 1  | 0.616877  | -4.214159 | -0.789875 |
| 1     | 1.555772  | -2.823433 | -1.422792 | 1  | 1.592538  | -2.897422 | -1.455483 |
| 1     | 1.924835  | -3.266639 | 0.245424  | 1  | 1.857021  | -3.451970 | 0.209226  |
| 6     | -2.601439 | -0.064145 | 2.322166  | 6  | -2.625769 | -0.299387 | 2.404560  |
| 1     | -2.158829 | 0.005128  | 3.320075  | 1  | -2.151610 | -0.272309 | 3.395033  |
| 1     | -2.838401 | 0.961500  | 2.007634  | 1  | -2.944971 | 0.726970  | 2.166245  |
| 1     | -3.558223 | -0.591364 | 2.435062  | 1  | -3.538781 | -0.910927 | 2.502087  |
| 6     | -2.884601 | 0.038820  | -0.878829 | 6  | -2.967548 | -0.072524 | -0.810838 |
| 1     | -3.612218 | -0.672605 | -1.290306 | 1  | -3.686925 | -0.828003 | -1.165029 |
| 1     | -3.397540 | 0.686756  | -0.165531 | 1  | -3.470218 | 0.567627  | -0.078712 |
| 1     | -2.496873 | 0.668941  | -1.688766 | 1  | -2.654296 | 0.556489  | -1.654184 |
| 6     | -1.031173 | -1.574506 | -2.307512 | 6  | -1.089455 | -1.627841 | -2.325229 |
| 1     | -1.912326 | -2.175468 | -2.566786 | 1  | -1.999672 | -2.210861 | -2.536194 |
| 1     | -1.101567 | -0.606777 | -2.818723 | 1  | -1.150116 | -0.667660 | -2.855737 |
| 1     | -0.143619 | -2.095255 | -2.675564 | 1  | -0.231283 | -2.186316 | -2.714516 |
| 6     | -1.106682 | 3.146114  | -0.472094 | 6  | -1.082732 | 3.245579  | -0.542372 |
| 1     | -1.555772 | 2.823433  | -1.422792 | 1  | -1.592538 | 2.897422  | -1.455483 |
| 1     | -1.924835 | 3.266639  | 0.245424  | 1  | -1.857021 | 3.451970  | 0.209226  |
| 1     | -0.702110 | 4.150894  | -0.650885 | 1  | -0.616877 | 4.214159  | -0.789875 |
| 6     | 2.601439  | 0.064145  | 2.322166  | 6  | 2.625769  | 0.299387  | 2.404560  |
| 1     | 2.838401  | -0.961500 | 2.007634  | 1  | 2.944971  | -0.726970 | 2.166245  |
| 1     | 3.558223  | 0.591364  | 2.435062  | 1  | 3.538781  | 0.910927  | 2.502087  |
| 1     | 2.158829  | -0.005128 | 3.320075  | 1  | 2.151610  | 0.272309  | 3.395033  |
| 6     | 2.884601  | -0.038820 | -0.878829 | 6  | 2.967548  | 0.072524  | -0.810838 |
| 1     | 3.612218  | 0.672605  | -1.290306 | 1  | 3.686925  | 0.828003  | -1.165029 |
| 1     | 3.397540  | -0.686756 | -0.165531 | 1  | 3.470218  | -0.567627 | -0.078712 |
| 1     | 2.496873  | -0.668941 | -1.688766 | 1  | 2.654296  | -0.556489 | -1.654184 |
| 6     | 1.031173  | 1.574506  | -2.307512 | 6  | 1.089455  | 1.627841  | -2.325229 |
| 1     | 1.912326  | 2.175468  | -2.566786 | 1  | 1.999672  | 2.210861  | -2.536194 |
| 1     | 1.101567  | 0.606777  | -2.818723 | 1  | 1.150116  | 0.667660  | -2.855737 |
| 1     | 0.143619  | 2.095255  | -2.675564 | 1  | 0.231283  | 2.186316  | -2.714516 |
| 26    | 0.000000  | 0.000000  | 0.186158  | 26 | 0.000000  | 0.000000  | 0.167649  |

**Table S26.** Atomic coordinates of the optimized structures for the Fe-t-180 complexes.

| M06-L |           |           | B3LYP*    |    |           |           |           |
|-------|-----------|-----------|-----------|----|-----------|-----------|-----------|
| X     | Y         | Z         | X         | Y  | Z         |           |           |
| 6     | -1.009557 | -0.207167 | -1.852536 | 6  | 1.160375  | 0.191146  | -1.807653 |
| 1     | -0.582703 | 0.043843  | -2.822897 | 1  | 0.795519  | -0.002076 | -2.818053 |
| 1     | 0.582590  | -0.043700 | 2.822883  | 1  | -0.795503 | 0.002042  | 2.818054  |
| 6     | 1.009487  | 0.207256  | 1.852527  | 6  | -1.160366 | -0.191167 | 1.807655  |
| 26    | 0.000000  | 0.000000  | 0.000000  | 26 | -0.000002 | 0.000003  | -0.000004 |
| 5     | -1.946354 | 0.710629  | -1.069872 | 5  | 2.082823  | -0.755168 | -1.021200 |
| 5     | 0.973018  | 1.550199  | 1.164209  | 5  | -1.165020 | -1.527962 | 1.098467  |
| 5     | 1.946331  | -0.710577 | 1.069967  | 5  | -2.082821 | 0.755156  | 1.021222  |
| 5     | -0.973071 | -1.550154 | -1.164300 | 5  | 1.165030  | 1.527952  | -1.098485 |
| 7     | -2.303153 | -0.015891 | 0.154888  | 7  | 2.361156  | -0.091363 | 0.247311  |
| 7     | -1.560439 | -1.256798 | 0.182206  | 7  | 1.630828  | 1.171853  | 0.281060  |
| 7     | 1.560454  | 1.256765  | -0.182255 | 7  | -1.630831 | -1.171846 | -0.281070 |
| 7     | 2.303177  | 0.015864  | -0.154828 | 7  | -2.361159 | 0.091370  | -0.247299 |
| 6     | 0.407261  | 2.984201  | 1.480830  | 6  | -0.739333 | -3.008503 | 1.474459  |
| 1     | 1.212049  | 3.708124  | 1.666704  | 1  | -1.628402 | -3.644901 | 1.621184  |
| 1     | -0.197669 | 3.398546  | 0.662439  | 1  | -0.120906 | -3.501089 | 0.707531  |
| 1     | -0.223573 | 2.980126  | 2.375366  | 1  | -0.175058 | -3.028579 | 2.417059  |
| 6     | 2.500736  | -2.153551 | 1.352685  | 6  | -2.666904 | 2.194654  | 1.338769  |
| 1     | 1.801495  | -2.735598 | 1.962841  | 1  | -2.334680 | 2.556671  | 2.321003  |
| 1     | 2.716906  | -2.741168 | 0.451861  | 1  | -2.367929 | 2.946466  | 0.590361  |
| 1     | 3.435374  | -2.104192 | 1.925516  | 1  | -3.769030 | 2.183803  | 1.350683  |
| 6     | 2.802881  | -0.480533 | -1.416549 | 6  | -2.909960 | 0.613213  | -1.485750 |
| 1     | 3.606477  | 0.150310  | -1.817345 | 1  | -3.707101 | -0.029966 | -1.889594 |
| 1     | 3.211873  | -1.476208 | -1.234002 | 1  | -3.350233 | 1.588939  | -1.252056 |
| 1     | 2.011054  | -0.570133 | -2.175858 | 1  | -2.144407 | 0.760136  | -2.264077 |
| 6     | 1.879354  | 2.203126  | -1.230192 | 6  | -1.976645 | -2.108742 | -1.342451 |
| 1     | 2.910282  | 2.567267  | -1.131561 | 1  | -3.021189 | -2.445803 | -1.245406 |
| 1     | 1.740759  | 1.774727  | -2.228081 | 1  | -1.824592 | -1.674287 | -2.338236 |
| 1     | 1.197440  | 3.049036  | -1.123359 | 1  | -1.317309 | -2.977076 | -1.243279 |
| 6     | -2.500761 | 2.153632  | -1.352443 | 6  | 2.666904  | -2.194672 | -1.338723 |
| 1     | -2.716590 | 2.741263  | -0.451546 | 1  | 2.367897  | -2.946476 | -0.590320 |
| 1     | -1.801684 | 2.735631  | -1.962829 | 1  | 2.334707  | -2.556691 | -2.320966 |
| 1     | -3.435599 | 2.104333  | -1.924954 | 1  | 3.769031  | -2.183832 | -1.350602 |
| 6     | -0.407308 | -2.984133 | -1.481018 | 6  | 0.739356  | 3.008490  | -1.474503 |
| 1     | 0.197804  | -3.398430 | -0.662736 | 1  | 0.120927  | 3.501092  | -0.707587 |
| 1     | -1.212091 | -3.708106 | -1.666723 | 1  | 1.628429  | 3.644879  | -1.621233 |
| 1     | 0.223355  | -2.980035 | -2.375674 | 1  | 0.175086  | 3.028555  | -2.417107 |
| 6     | -1.879291 | -2.203219 | 1.230103  | 6  | 1.976638  | 2.108763  | 1.342430  |
| 1     | -2.910238 | -2.567321 | 1.131523  | 1  | 3.021186  | 2.445814  | 1.245392  |
| 1     | -1.197414 | -3.049144 | 1.123159  | 1  | 1.317311  | 2.977102  | 1.243236  |
| 1     | -1.740609 | -1.774891 | 2.228010  | 1  | 1.824570  | 1.674325  | 2.338220  |
| 6     | -2.802824 | 0.480424  | 1.416654  | 6  | 2.909940  | -0.613194 | 1.485775  |
| 1     | -3.606397 | -0.150456 | 1.817437  | 1  | 3.707075  | 0.029989  | 1.889623  |
| 1     | -2.010974 | 0.569991  | 2.175942  | 1  | 2.144377  | -0.760108 | 2.264093  |
| 1     | -3.211839 | 1.476102  | 1.234176  | 1  | 3.350217  | -1.588921 | 1.252097  |

**Table S27.** Atomic coordinates of the optimized structures for the **Fe-t-36** complexes.

| M06-L |           |           | B3LYP*    |    |           |           |           |
|-------|-----------|-----------|-----------|----|-----------|-----------|-----------|
| X     | Y         | Z         | X         | Y  | Z         |           |           |
| 6     | 1.018087  | -1.269970 | 1.601648  | 6  | 0.843138  | -1.432269 | 1.597862  |
| 1     | 1.104797  | -1.065491 | 2.666290  | 1  | 0.953182  | -1.262227 | 2.669245  |
| 1     | -1.104797 | 1.065491  | 2.666290  | 1  | -0.953182 | 1.262227  | 2.669245  |
| 6     | -1.018087 | 1.269970  | 1.601648  | 6  | -0.843138 | 1.432269  | 1.597862  |
| 5     | 1.987659  | -0.829630 | 0.517680  | 5  | 1.886802  | -1.136840 | 0.532392  |
| 5     | -1.987659 | 0.829630  | 0.517680  | 5  | -1.886802 | 1.136840  | 0.532392  |
| 5     | 0.000000  | 2.226716  | 0.978661  | 5  | 0.238643  | 2.319705  | 0.955118  |
| 5     | 0.000000  | -2.226716 | 0.978661  | 5  | -0.238643 | -2.319705 | 0.955118  |
| 7     | 1.297343  | -1.217374 | -0.743425 | 7  | 1.160121  | -1.400965 | -0.742552 |
| 7     | 0.224921  | -2.152815 | -0.464081 | 7  | 0.000000  | -2.251071 | -0.479254 |
| 7     | -1.297343 | 1.217374  | -0.743425 | 7  | -1.160121 | 1.400965  | -0.742552 |
| 7     | -0.224921 | 2.152815  | -0.464081 | 7  | 0.000000  | 2.251071  | -0.479254 |
| 6     | -3.364326 | 0.069281  | 0.469002  | 6  | -3.382774 | 0.611861  | 0.549949  |
| 1     | -4.201534 | 0.753086  | 0.273536  | 1  | -4.087760 | 1.439473  | 0.361506  |
| 1     | -3.405861 | -0.702014 | -0.313485 | 1  | -3.596088 | -0.163911 | -0.202571 |
| 1     | -3.578480 | -0.429872 | 1.418497  | 1  | -3.636499 | 0.194681  | 1.533843  |
| 6     | 1.150111  | 3.105662  | 1.586113  | 6  | 1.463740  | 3.129971  | 1.548948  |
| 1     | 1.529685  | 2.666125  | 2.513899  | 1  | 1.467109  | 3.098814  | 2.646422  |
| 1     | 2.009512  | 3.249686  | 0.919336  | 1  | 2.429632  | 2.722209  | 1.209346  |
| 1     | 0.782824  | 4.106359  | 1.846667  | 1  | 1.439848  | 4.189983  | 1.248091  |
| 6     | 0.628285  | 2.524282  | -1.564622 | 6  | 0.851695  | 2.623283  | -1.591493 |
| 1     | 0.099966  | 3.120644  | -2.320089 | 1  | 0.333043  | 3.264352  | -2.321341 |
| 1     | 1.438937  | 3.132577  | -1.158702 | 1  | 1.689856  | 3.193804  | -1.176461 |
| 1     | 1.075793  | 1.649505  | -2.063767 | 1  | 1.263366  | 1.750262  | -2.125867 |
| 6     | -1.853311 | 1.242694  | -2.076919 | 6  | -1.767657 | 1.519346  | -2.059591 |
| 1     | -2.293251 | 2.222328  | -2.309160 | 1  | -2.144035 | 2.540529  | -2.236203 |
| 1     | -1.111152 | 1.001224  | -2.848567 | 1  | -1.071396 | 1.255408  | -2.867701 |
| 1     | -2.647603 | 0.493600  | -2.116332 | 1  | -2.617671 | 0.829259  | -2.096899 |
| 6     | 3.364326  | -0.069281 | 0.469002  | 6  | 3.382774  | -0.611861 | 0.549949  |
| 1     | 3.405861  | 0.702014  | -0.313485 | 1  | 3.596088  | 0.163911  | -0.202571 |
| 1     | 3.578480  | 0.429872  | 1.418497  | 1  | 3.636499  | -0.194681 | 1.533843  |
| 1     | 4.201534  | -0.753086 | 0.273536  | 1  | 4.087760  | -1.439473 | 0.361506  |
| 6     | -1.150111 | -3.105662 | 1.586113  | 6  | -1.463740 | -3.129971 | 1.548948  |
| 1     | -2.009512 | -3.249686 | 0.919336  | 1  | -2.429632 | -2.722209 | 1.209346  |
| 1     | -0.782824 | -4.106359 | 1.846667  | 1  | -1.439848 | -4.189983 | 1.248091  |
| 1     | -1.529685 | -2.666125 | 2.513899  | 1  | -1.467109 | -3.098814 | 2.646422  |
| 6     | -0.628285 | -2.524282 | -1.564622 | 6  | -0.851695 | -2.623283 | -1.591493 |
| 1     | -0.099966 | -3.120644 | -2.320089 | 1  | -0.333043 | -3.264352 | -2.321341 |
| 1     | -1.438937 | -3.132577 | -1.158702 | 1  | -1.689856 | -3.193804 | -1.176461 |
| 1     | -1.075793 | -1.649505 | -2.063767 | 1  | -1.263366 | -1.750262 | -2.125867 |
| 6     | 1.853311  | -1.242694 | -2.076919 | 6  | 1.767657  | -1.519346 | -2.059591 |
| 1     | 2.293251  | -2.222328 | -2.309160 | 1  | 2.144035  | -2.540529 | -2.236203 |
| 1     | 1.111152  | -1.001224 | -2.848567 | 1  | 1.071396  | -1.255408 | -2.867701 |
| 1     | 2.647603  | -0.493600 | -2.116332 | 1  | 2.617671  | -0.829259 | -2.096899 |
| 26    | 0.000000  | 0.000000  | 0.336260  | 26 | 0.000000  | 0.000000  | 0.323049  |



**Table S28.** Atomic coordinates of the optimized structures for the Fe-t-144 complexes.

| M06-L |           |           | B3LYP*    |    |           |           |           |
|-------|-----------|-----------|-----------|----|-----------|-----------|-----------|
| X     | Y         | Z         | X         | Y  | Z         |           |           |
| 6     | 0.000000  | 2.096528  | 0.292316  | 6  | 0.000000  | 2.146238  | 0.368875  |
| 1     | -0.884867 | 2.703390  | 0.480175  | 1  | -0.873718 | 2.753490  | 0.612252  |
| 1     | 0.884867  | -2.703390 | 0.480175  | 1  | 0.873718  | -2.753490 | 0.612252  |
| 6     | 0.000000  | -2.096528 | 0.292316  | 6  | 0.000000  | -2.146238 | 0.368875  |
| 5     | 0.619931  | 1.858028  | -1.081875 | 5  | 0.595917  | 1.991186  | -1.037313 |
| 5     | -0.619931 | -1.858028 | -1.081875 | 5  | -0.595917 | -1.991186 | -1.037313 |
| 5     | -0.963503 | -1.575975 | 1.345518  | 5  | -1.019689 | -1.621516 | 1.362977  |
| 5     | 0.963503  | 1.575975  | 1.345518  | 5  | 1.019689  | 1.621516  | 1.362977  |
| 7     | 1.767523  | 0.985318  | -0.856031 | 7  | 1.748940  | 1.114379  | -0.890265 |
| 7     | 1.881910  | 0.702796  | 0.563085  | 7  | 1.886683  | 0.743466  | 0.519943  |
| 7     | -1.767523 | -0.985318 | -0.856031 | 7  | -1.748940 | -1.114379 | -0.890265 |
| 7     | -1.881910 | -0.702796 | 0.563085  | 7  | -1.886683 | -0.743466 | 0.519943  |
| 6     | -0.217931 | -2.259810 | -2.550211 | 6  | -0.143320 | -2.517790 | -2.464069 |
| 1     | -1.019807 | -2.809581 | -3.059028 | 1  | -0.934247 | -3.120027 | -2.939806 |
| 1     | -0.006510 | -1.381564 | -3.177265 | 1  | 0.088708  | -1.696682 | -3.162059 |
| 1     | 0.672637  | -2.894553 | -2.577517 | 1  | 0.749521  | -3.153583 | -2.393876 |
| 6     | -1.117127 | -1.711871 | 2.903957  | 6  | -1.249495 | -1.765859 | 2.923978  |
| 1     | -0.196711 | -2.081028 | 3.367009  | 1  | -0.383793 | -2.240014 | 3.406323  |
| 1     | -1.366074 | -0.763409 | 3.398083  | 1  | -1.424517 | -0.804291 | 3.431096  |
| 1     | -1.911766 | -2.420901 | 3.172738  | 1  | -2.124883 | -2.403048 | 3.135982  |
| 6     | -3.073094 | -0.022699 | 1.016684  | 6  | -3.138369 | -0.120055 | 0.924680  |
| 1     | -3.966105 | -0.649527 | 0.888547  | 1  | -3.987594 | -0.810630 | 0.794584  |
| 1     | -2.943008 | 0.183771  | 2.080979  | 1  | -3.051200 | 0.128814  | 1.987379  |
| 1     | -3.226700 | 0.930903  | 0.501262  | 1  | -3.336543 | 0.806363  | 0.370938  |
| 6     | -2.554791 | -0.198345 | -1.772987 | 6  | -2.552602 | -0.420896 | -1.879346 |
| 1     | -3.631337 | -0.379216 | -1.655024 | 1  | -3.629687 | -0.601767 | -1.739752 |
| 1     | -2.367011 | 0.880739  | -1.675767 | 1  | -2.376319 | 0.666017  | -1.890582 |
| 1     | -2.268628 | -0.500199 | -2.782987 | 1  | -2.268386 | -0.822149 | -2.858646 |
| 6     | 0.217931  | 2.259810  | -2.550211 | 6  | 0.143320  | 2.517790  | -2.464069 |
| 1     | 0.006510  | 1.381564  | -3.177265 | 1  | -0.088708 | 1.696682  | -3.162059 |
| 1     | -0.672637 | 2.894553  | -2.577517 | 1  | -0.749521 | 3.153583  | -2.393876 |
| 1     | 1.019807  | 2.809581  | -3.059028 | 1  | 0.934247  | 3.120027  | -2.939806 |
| 6     | 1.117127  | 1.711871  | 2.903957  | 6  | 1.249495  | 1.765859  | 2.923978  |
| 1     | 1.366074  | 0.763409  | 3.398083  | 1  | 1.424517  | 0.804291  | 3.431096  |
| 1     | 1.911766  | 2.420901  | 3.172738  | 1  | 2.124883  | 2.403048  | 3.135982  |
| 1     | 0.196711  | 2.081028  | 3.367009  | 1  | 0.383793  | 2.240014  | 3.406323  |
| 6     | 3.073094  | 0.022699  | 1.016684  | 6  | 3.138369  | 0.120055  | 0.924680  |
| 1     | 3.966105  | 0.649527  | 0.888547  | 1  | 3.987594  | 0.810630  | 0.794584  |
| 1     | 2.943008  | -0.183771 | 2.080979  | 1  | 3.051200  | -0.128814 | 1.987379  |
| 1     | 3.226700  | -0.930903 | 0.501262  | 1  | 3.336543  | -0.806363 | 0.370938  |
| 6     | 2.554791  | 0.198345  | -1.772987 | 6  | 2.552602  | 0.420896  | -1.879346 |
| 1     | 3.631337  | 0.379216  | -1.655024 | 1  | 3.629687  | 0.601767  | -1.739752 |
| 1     | 2.367011  | -0.880739 | -1.675767 | 1  | 2.376319  | -0.666017 | -1.890582 |
| 1     | 2.268628  | 0.500199  | -2.782987 | 1  | 2.268386  | 0.822149  | -2.858646 |
| 26    | 0.000000  | 0.000000  | 0.187128  | 26 | 0.000000  | 0.000000  | 0.228107  |

**Table S29.** Atomic coordinates of the optimized structures for the **Fe-p-180** complexes.

| M06-L |           |           | B3LYP*    |    |           |           |           |
|-------|-----------|-----------|-----------|----|-----------|-----------|-----------|
|       | X         | Y         | Z         |    | X         | Y         | Z         |
| 6     | -1.064084 | 0.004358  | -1.839151 | 6  | 1.194221  | 0.006209  | -1.773168 |
| 1     | -0.534053 | -0.013865 | -2.789723 | 1  | 0.717197  | 0.028798  | -2.754678 |
| 1     | 0.534053  | 0.013865  | 2.789723  | 1  | -0.717190 | -0.028828 | 2.754675  |
| 6     | 1.064084  | -0.004358 | 1.839151  | 6  | -1.194217 | -0.006227 | 1.773167  |
| 26    | 0.000000  | 0.000000  | 0.000000  | 26 | -0.000001 | 0.000007  | -0.000003 |
| 5     | -1.605959 | 1.249079  | -1.146114 | 5  | 1.760470  | -1.241627 | -1.082620 |
| 5     | 1.615748  | 1.214128  | 1.107103  | 5  | -1.762441 | -1.221842 | 1.034853  |
| 5     | 1.605959  | -1.249079 | 1.146114  | 5  | -1.760479 | 1.241615  | 1.082642  |
| 5     | -1.615748 | -1.214128 | -1.107103 | 5  | 1.762455  | 1.221831  | -1.034874 |
| 7     | -2.273160 | 0.754291  | 0.066320  | 7  | 2.374241  | -0.753497 | 0.152312  |
| 7     | -2.249104 | -0.671884 | 0.106269  | 7  | 2.338558  | 0.683356  | 0.203312  |
| 7     | 2.249104  | 0.671884  | -0.106269 | 7  | -2.338554 | -0.683350 | -0.203322 |
| 7     | 2.273160  | -0.754291 | -0.066320 | 7  | -2.374248 | 0.753502  | -0.152298 |
| 6     | 1.587265  | 2.764600  | 1.380996  | 6  | -1.798235 | -2.774923 | 1.362867  |
| 1     | 2.513833  | 3.102732  | 1.862813  | 1  | -2.815140 | -3.089668 | 1.651239  |
| 1     | 1.468803  | 3.371249  | 0.473669  | 1  | -1.497463 | -3.410863 | 0.515362  |
| 1     | 0.769942  | 3.036954  | 2.057355  | 1  | -1.138893 | -3.017039 | 2.207588  |
| 6     | 1.519572  | -2.791999 | 1.450484  | 6  | -1.736734 | 2.788831  | 1.442441  |
| 1     | 0.682585  | -3.020055 | 2.119113  | 1  | -1.125289 | 2.977420  | 2.335338  |
| 1     | 1.393126  | -3.414603 | 0.555226  | 1  | -1.337744 | 3.419548  | 0.631972  |
| 1     | 2.425746  | -3.151799 | 1.954513  | 1  | -2.751528 | 3.159233  | 1.662867  |
| 6     | 2.744791  | -1.465573 | -1.228679 | 6  | -2.901153 | 1.483975  | -1.289240 |
| 1     | 3.789987  | -1.227752 | -1.462758 | 1  | -3.958142 | 1.244353  | -1.483249 |
| 1     | 2.682104  | -2.531670 | -1.003375 | 1  | -2.834566 | 2.549919  | -1.047437 |
| 1     | 2.134025  | -1.270458 | -2.122714 | 1  | -2.326263 | 1.305065  | -2.212048 |
| 6     | 2.933666  | 1.344934  | -1.179653 | 6  | -3.137973 | -1.363559 | -1.203742 |
| 1     | 4.018777  | 1.175682  | -1.147935 | 1  | -4.217921 | -1.196927 | -1.052052 |
| 1     | 2.562616  | 1.048557  | -2.169381 | 1  | -2.877004 | -1.063748 | -2.228753 |
| 1     | 2.753501  | 2.414992  | -1.058665 | 1  | -2.942018 | -2.436440 | -1.104077 |
| 6     | -1.519572 | 2.791999  | -1.450484 | 6  | 1.736709  | -2.788849 | -1.442389 |
| 1     | -1.393126 | 3.414603  | -0.555226 | 1  | 1.337688  | -3.419542 | -0.631916 |
| 1     | -0.682585 | 3.020055  | -2.119113 | 1  | 1.125280  | -2.977447 | -2.335296 |
| 1     | -2.425746 | 3.151799  | -1.954513 | 1  | 2.751500  | -3.159274 | -1.662784 |
| 6     | -1.587265 | -2.764600 | -1.380996 | 6  | 1.798266  | 2.774905  | -1.362917 |
| 1     | -1.468803 | -3.371249 | -0.473669 | 1  | 1.497506  | 3.410866  | -0.515423 |
| 1     | -2.513833 | -3.102732 | -1.862813 | 1  | 2.815173  | 3.089632  | -1.651299 |
| 1     | -0.769942 | -3.036954 | -2.057355 | 1  | 1.138923  | 3.017013  | -2.207640 |
| 6     | -2.933666 | -1.344934 | 1.179653  | 6  | 3.137986  | 1.363574  | 1.203720  |
| 1     | -4.018777 | -1.175682 | 1.147935  | 1  | 4.217931  | 1.196929  | 1.052031  |
| 1     | -2.753501 | -2.414992 | 1.058665  | 1  | 2.942041  | 2.436455  | 1.104036  |
| 1     | -2.562616 | -1.048557 | 2.169381  | 1  | 2.877014  | 1.063783  | 2.228736  |
| 6     | -2.744791 | 1.465573  | 1.228679  | 6  | 2.901135  | -1.483955 | 1.289268  |
| 1     | -3.789987 | 1.227752  | 1.462758  | 1  | 3.958126  | -1.244342 | 1.483276  |
| 1     | -2.134025 | 1.270458  | 2.122714  | 1  | 2.326245  | -1.305022 | 2.212072  |
| 1     | -2.682104 | 2.531670  | 1.003375  | 1  | 2.834537  | -2.549903 | 1.047485  |

**Table S30.** Atomic coordinates of the optimized structures for the Co-d-180 complexes.

| M06-L |           |           | B3LYP*    |    |           |           |           |
|-------|-----------|-----------|-----------|----|-----------|-----------|-----------|
| X     | Y         | Z         | X         | Y  | Z         |           |           |
| 6     | -0.961163 | 0.304509  | 1.871593  | 6  | 1.095832  | -0.281002 | 1.849254  |
| 1     | -0.522670 | 0.051018  | 2.835938  | 1  | 0.708964  | -0.068255 | 2.847475  |
| 1     | 0.522670  | -0.051018 | -2.835938 | 1  | -0.708963 | 0.068259  | -2.847476 |
| 6     | 0.961163  | -0.304509 | -1.871593 | 6  | -1.095831 | 0.281004  | -1.849254 |
| 5     | -1.885834 | -0.604230 | 1.073525  | 5  | 2.016597  | 0.648569  | 1.051674  |
| 5     | 0.820532  | -1.616978 | -1.157392 | 5  | -0.997659 | 1.597089  | -1.125424 |
| 5     | 1.885834  | 0.604230  | -1.073525 | 5  | -2.016596 | -0.648568 | -1.051675 |
| 5     | -0.820532 | 1.616978  | 1.157392  | 5  | 0.997659  | -1.597088 | 1.125425  |
| 7     | -2.202173 | 0.123301  | -0.170238 | 7  | 2.268686  | -0.027657 | -0.223095 |
| 7     | -1.420391 | 1.341735  | -0.192866 | 7  | 1.494077  | -1.264480 | -0.254012 |
| 7     | 1.420391  | -1.341735 | 0.192866  | 7  | -1.494077 | 1.264479  | 0.254012  |
| 7     | 2.202173  | -0.123301 | 0.170238  | 7  | -2.268685 | 0.027656  | 0.223095  |
| 6     | 0.143576  | -3.008893 | -1.437438 | 6  | -0.445409 | 3.043222  | -1.468288 |
| 1     | 0.888860  | -3.793914 | -1.622036 | 1  | -1.275067 | 3.759753  | -1.589771 |
| 1     | -0.477008 | -3.361811 | -0.602313 | 1  | 0.220856  | 3.457375  | -0.695204 |
| 1     | -0.498937 | -2.972784 | -2.322896 | 1  | 0.110760  | 3.037310  | -2.415850 |
| 6     | 2.475469  | 2.037369  | -1.338926 | 6  | -2.635294 | -2.075650 | -1.360218 |
| 1     | 1.809136  | 2.631362  | -1.974284 | 1  | -2.214097 | -2.503130 | -2.280337 |
| 1     | 2.672074  | 2.623155  | -0.432162 | 1  | -2.476768 | -2.804947 | -0.550140 |
| 1     | 3.427656  | 1.969388  | -1.880259 | 1  | -3.725039 | -2.002377 | -1.511005 |
| 6     | 2.774205  | 0.331064  | 1.415267  | 6  | -2.861290 | -0.455321 | 1.456908  |
| 1     | 3.574616  | -0.333062 | 1.766674  | 1  | -3.643180 | 0.222712  | 1.832785  |
| 1     | 3.208573  | 1.315186  | 1.227686  | 1  | -3.332026 | -1.417803 | 1.228209  |
| 1     | 2.021879  | 0.437147  | 2.210353  | 1  | -2.114599 | -0.616912 | 2.249366  |
| 6     | 1.655586  | -2.275593 | 1.272995  | 6  | -1.777093 | 2.208798  | 1.326644  |
| 1     | 2.668835  | -2.693171 | 1.214612  | 1  | -2.801793 | 2.603941  | 1.239504  |
| 1     | 1.507850  | -1.815354 | 2.254981  | 1  | -1.641456 | 1.757502  | 2.316765  |
| 1     | 0.935669  | -3.088780 | 1.162145  | 1  | -1.071294 | 3.039565  | 1.226810  |
| 6     | -2.475469 | -2.037369 | 1.338926  | 6  | 2.635295  | 2.075651  | 1.360214  |
| 1     | -2.672074 | -2.623155 | 0.432162  | 1  | 2.476761  | 2.804948  | 0.550138  |
| 1     | -1.809136 | -2.631362 | 1.974284  | 1  | 2.214106  | 2.503129  | 2.280337  |
| 1     | -3.427656 | -1.969388 | 1.880259  | 1  | 3.725041  | 2.002380  | 1.510991  |
| 6     | -0.143576 | 3.008893  | 1.437438  | 6  | 0.445408  | -3.043220 | 1.468291  |
| 1     | 0.477008  | 3.361811  | 0.602313  | 1  | -0.220858 | -3.457373 | 0.695208  |
| 1     | -0.888860 | 3.793914  | 1.622036  | 1  | 1.275067  | -3.759751 | 1.589774  |
| 1     | 0.498937  | 2.972784  | 2.322896  | 1  | -0.110760 | -3.037307 | 2.415854  |
| 6     | -1.655586 | 2.275593  | -1.272995 | 6  | 1.777092  | -2.208800 | -1.326642 |
| 1     | -2.668835 | 2.693171  | -1.214612 | 1  | 2.801793  | -2.603943 | -1.239501 |
| 1     | -0.935669 | 3.088780  | -1.162145 | 1  | 1.071294  | -3.039567 | -1.226806 |
| 1     | -1.507850 | 1.815354  | -2.254981 | 1  | 1.641456  | -1.757506 | -2.316763 |
| 6     | -2.774205 | -0.331064 | -1.415267 | 6  | 2.861289  | 0.455319  | -1.456910 |
| 1     | -3.574616 | 0.333062  | -1.766674 | 1  | 3.643177  | -0.222715 | -1.832788 |
| 1     | -2.021879 | -0.437147 | -2.210353 | 1  | 2.114596  | 0.616911  | -2.249366 |
| 1     | -3.208573 | -1.315186 | -1.227686 | 1  | 3.332026  | 1.417801  | -1.228212 |
| 27    | 0.000000  | 0.000000  | 0.000000  | 27 | 0.000000  | 0.000000  | 0.000000  |

**Table S31.** Atomic coordinates of the optimized structures for the Co-d-36 complexes.

| M06-L |           |           | B3LYP*    |    |           |           |           |
|-------|-----------|-----------|-----------|----|-----------|-----------|-----------|
| X     | Y         | Z         | X         | Y  | Z         |           |           |
| 6     | -1.154379 | 1.140486  | 1.554001  | 6  | 1.123785  | -1.227479 | 1.534847  |
| 1     | -1.343737 | 0.808037  | 2.571911  | 1  | 1.360839  | -0.921619 | 2.553779  |
| 1     | 1.343737  | -0.808037 | 2.571911  | 1  | -1.360839 | 0.921619  | 2.553779  |
| 6     | 1.154379  | -1.140486 | 1.554001  | 6  | -1.123785 | 1.227479  | 1.534847  |
| 5     | -1.991342 | 0.804956  | 0.347984  | 5  | 1.965863  | -0.961572 | 0.309771  |
| 5     | 1.991342  | -0.804956 | 0.347984  | 5  | -1.965863 | 0.961572  | 0.309771  |
| 5     | 0.000000  | -2.046335 | 1.136162  | 5  | 0.030578  | 2.160913  | 1.146029  |
| 5     | 0.000000  | 2.046335  | 1.136162  | 5  | -0.030578 | -2.160913 | 1.146029  |
| 7     | -1.159675 | 1.277208  | -0.800546 | 7  | 1.074317  | -1.375488 | -0.816664 |
| 7     | -0.085118 | 2.135273  | -0.331716 | 7  | 0.000000  | -2.232687 | -0.314467 |
| 7     | 1.159675  | -1.277208 | -0.800546 | 7  | -1.074317 | 1.375488  | -0.816664 |
| 7     | 0.085118  | -2.135273 | -0.331716 | 7  | 0.000000  | 2.232687  | -0.314467 |
| 6     | 3.344013  | -0.047586 | 0.079242  | 6  | -3.391307 | 0.320594  | 0.040861  |
| 1     | 4.157200  | -0.743975 | -0.165487 | 1  | -4.131658 | 1.103333  | -0.196205 |
| 1     | 3.289949  | 0.666435  | -0.755431 | 1  | -3.413470 | -0.398122 | -0.794382 |
| 1     | 3.665023  | 0.514454  | 0.961242  | 1  | -3.756631 | -0.202191 | 0.935162  |
| 6     | -1.144831 | -2.773235 | 1.927304  | 6  | 1.128124  | 2.929482  | 1.990313  |
| 1     | -1.420954 | -2.202337 | 2.819711  | 1  | 1.138733  | 2.579293  | 3.030995  |
| 1     | -2.063469 | -2.932150 | 1.348428  | 1  | 2.148217  | 2.813482  | 1.592146  |
| 1     | -0.817757 | -3.759293 | 2.280567  | 1  | 0.913806  | 4.010987  | 2.015917  |
| 6     | -0.869645 | -2.595201 | -1.307540 | 6  | 0.954293  | 2.776877  | -1.259233 |
| 1     | -0.425968 | -3.298483 | -2.024730 | 1  | 0.486335  | 3.479231  | -1.966773 |
| 1     | -1.661132 | -3.116634 | -0.765561 | 1  | 1.698903  | 3.330464  | -0.677295 |
| 1     | -1.333446 | -1.769211 | -1.871216 | 1  | 1.482362  | 1.998806  | -1.835399 |
| 6     | 1.546850  | -1.394357 | -2.187583 | 6  | -1.460565 | 1.542309  | -2.209615 |
| 1     | 1.945438  | -2.393849 | -2.407123 | 1  | -1.865955 | 2.550679  | -2.392718 |
| 1     | 0.718532  | -1.189056 | -2.876258 | 1  | -0.624316 | 1.366653  | -2.899826 |
| 1     | 2.338436  | -0.663471 | -2.369922 | 1  | -2.248329 | 0.812173  | -2.424503 |
| 6     | -3.344013 | 0.047586  | 0.079242  | 6  | 3.391307  | -0.320594 | 0.040861  |
| 1     | -3.289949 | -0.666435 | -0.755431 | 1  | 3.413470  | 0.398122  | -0.794382 |
| 1     | -3.665023 | -0.514454 | 0.961242  | 1  | 3.756631  | 0.202191  | 0.935162  |
| 1     | -4.157200 | 0.743975  | -0.165487 | 1  | 4.131658  | -1.103333 | -0.196205 |
| 6     | 1.144831  | 2.773235  | 1.927304  | 6  | -1.128124 | -2.929482 | 1.990313  |
| 1     | 2.063469  | 2.932150  | 1.348428  | 1  | -2.148217 | -2.813482 | 1.592146  |
| 1     | 0.817757  | 3.759293  | 2.280567  | 1  | -0.913806 | -4.010987 | 2.015917  |
| 1     | 1.420954  | 2.202337  | 2.819711  | 1  | -1.138733 | -2.579293 | 3.030995  |
| 6     | 0.869645  | 2.595201  | -1.307540 | 6  | -0.954293 | -2.776877 | -1.259233 |
| 1     | 0.425968  | 3.298483  | -2.024730 | 1  | -0.486335 | -3.479231 | -1.966773 |
| 1     | 1.661132  | 3.116634  | -0.765561 | 1  | -1.698903 | -3.330464 | -0.677295 |
| 1     | 1.333446  | 1.769211  | -1.871216 | 1  | -1.482362 | -1.998806 | -1.835399 |
| 6     | -1.546850 | 1.394357  | -2.187583 | 6  | 1.460565  | -1.542309 | -2.209615 |
| 1     | -1.945438 | 2.393849  | -2.407123 | 1  | 1.865955  | -2.550679 | -2.392718 |
| 1     | -0.718532 | 1.189056  | -2.876258 | 1  | 0.624316  | -1.366653 | -2.899826 |
| 1     | -2.338436 | 0.663471  | -2.369922 | 1  | 2.248329  | -0.812173 | -2.424503 |
| 27    | 0.000000  | 0.000000  | 0.249365  | 27 | 0.000000  | 0.000000  | 0.230739  |

**Table S32.** Atomic coordinates of the optimized structures for the **Co-q-180** complexes.

| M06-L |           |           | B3LYP*    |    |           |           |           |
|-------|-----------|-----------|-----------|----|-----------|-----------|-----------|
| X     | Y         | Z         | X         | Y  | Z         |           |           |
| 6     | 1.001261  | 0.008196  | 1.845875  | 6  | 1.134818  | -0.052420 | 1.801934  |
| 1     | 0.480550  | 0.014687  | 2.801589  | 1  | 0.668468  | -0.084819 | 2.787635  |
| 1     | -0.480550 | 0.008235  | -2.801616 | 1  | -0.668468 | -0.084820 | -2.787635 |
| 6     | -1.001261 | 0.003945  | -1.845889 | 6  | -1.134818 | -0.052420 | -1.801934 |
| 5     | 1.547590  | 1.230857  | 1.122390  | 5  | 1.694152  | 1.196505  | 1.124788  |
| 5     | -1.547591 | 1.228268  | -1.125222 | 5  | -1.694150 | 1.196507  | -1.124789 |
| 5     | -1.532523 | -1.228408 | -1.127017 | 5  | -1.668949 | -1.258857 | -1.026614 |
| 5     | 1.532524  | -1.225809 | 1.129843  | 5  | 1.668947  | -1.258858 | 1.026615  |
| 7     | 2.167040  | 0.705684  | -0.108638 | 7  | 2.224911  | 0.729204  | -0.167514 |
| 7     | 2.169453  | -0.716856 | -0.098863 | 7  | 2.249051  | -0.704323 | -0.203358 |
| 7     | -2.167041 | 0.705932  | 0.107012  | 7  | -2.224910 | 0.729206  | 0.167514  |
| 7     | -2.169453 | -0.716627 | 0.100514  | 7  | -2.249052 | -0.704320 | 0.203358  |
| 6     | -1.517666 | 2.775741  | -1.410857 | 6  | -1.750019 | 2.729240  | -1.532244 |
| 1     | -2.466409 | 3.124567  | -1.838808 | 1  | -2.779287 | 3.027132  | -1.793553 |
| 1     | -1.339904 | 3.383404  | -0.513742 | 1  | -1.417229 | 3.409753  | -0.732464 |
| 1     | -0.736822 | 3.034797  | -2.133595 | 1  | -1.126721 | 2.927068  | -2.414886 |
| 6     | -1.474653 | -2.774695 | -1.415791 | 6  | -1.651309 | -2.823183 | -1.297350 |
| 1     | -0.673621 | -3.019600 | -2.121347 | 1  | -1.045828 | -3.064203 | -2.181753 |
| 1     | -1.309688 | -3.384555 | -0.517875 | 1  | -1.250622 | -3.408287 | -0.454406 |
| 1     | -2.407897 | -3.133949 | -1.868308 | 1  | -2.668565 | -3.201332 | -1.491835 |
| 6     | -2.706558 | -1.415761 | 1.240758  | 6  | -2.763491 | -1.372882 | 1.383614  |
| 1     | -3.773020 | -1.202450 | 1.389305  | 1  | -3.823903 | -1.136737 | 1.563381  |
| 1     | -2.597967 | -2.484052 | 1.044729  | 1  | -2.681204 | -2.450138 | 1.205752  |
| 1     | -2.167594 | -1.183915 | 2.169382  | 1  | -2.187295 | -1.129784 | 2.289554  |
| 6     | -2.770657 | 1.397656  | 1.217300  | 6  | -2.977599 | 1.466249  | 1.164477  |
| 1     | -3.851524 | 1.213280  | 1.278971  | 1  | -4.063086 | 1.295422  | 1.068863  |
| 1     | -2.312107 | 1.130949  | 2.178188  | 1  | -2.670268 | 1.219553  | 2.190220  |
| 1     | -2.616822 | 2.466067  | 1.054485  | 1  | -2.784286 | 2.531156  | 0.997852  |
| 6     | 1.517664  | 2.778983  | 1.404460  | 6  | 1.750023  | 2.729239  | 1.532243  |
| 1     | 1.339901  | 3.384579  | 0.505948  | 1  | 1.417234  | 3.409753  | 0.732463  |
| 1     | 0.736819  | 3.039704  | 2.126599  | 1  | 1.126725  | 2.927068  | 2.414885  |
| 1     | 2.466406  | 3.128795  | 1.831607  | 1  | 2.779291  | 3.027129  | 1.793553  |
| 6     | 1.474655  | -2.771426 | 1.422178  | 6  | 1.651304  | -2.823184 | 1.297351  |
| 1     | 1.309692  | -3.383353 | 0.525669  | 1  | 1.250617  | -3.408287 | 0.454406  |
| 1     | 2.407899  | -3.129637 | 1.875522  | 1  | 2.668559  | -3.201334 | 1.491836  |
| 1     | 0.673623  | -3.014706 | 2.128295  | 1  | 1.045823  | -3.064203 | 2.181754  |
| 6     | 2.706559  | -1.418614 | -1.237495 | 6  | 2.763489  | -1.372886 | -1.383613 |
| 1     | 3.773020  | -1.205643 | -1.386534 | 1  | 3.823901  | -1.136743 | -1.563381 |
| 1     | 2.597969  | -2.486450 | -1.039005 | 1  | 2.681200  | -2.450142 | -1.205751 |
| 1     | 2.167593  | -1.188907 | -2.166649 | 1  | 2.187293  | -1.129787 | -2.289553 |
| 6     | 2.770657  | 1.394850  | -1.220515 | 6  | 2.977602  | 1.466245  | -1.164477 |
| 1     | 3.851524  | 1.210335  | -1.281759 | 1  | 4.063089  | 1.295417  | -1.068862 |
| 1     | 2.312109  | 1.125930  | -2.180787 | 1  | 2.670272  | 1.219549  | -2.190220 |
| 1     | 2.616820  | 2.463633  | -1.060162 | 1  | 2.784290  | 2.531152  | -0.997852 |
| 27    | 0.000000  | 0.012723  | 0.000000  | 27 | 0.000000  | 0.038578  | 0.000000  |

**Table S33.** Atomic coordinates of the optimized structures for the Co-q-36 complexes.

| M06-L |           |           | B3LYP*    |    |           |           |           |
|-------|-----------|-----------|-----------|----|-----------|-----------|-----------|
| X     | Y         | Z         | X         | Y  | Z         |           |           |
| 6     | 0.985728  | -1.584252 | 1.599094  | 6  | 0.710764  | -1.739576 | 1.613441  |
| 1     | 1.160147  | -1.529812 | 2.669705  | 1  | 0.745870  | -1.749688 | 2.702840  |
| 1     | -1.160147 | 1.529812  | 2.669705  | 1  | -0.745870 | 1.749688  | 2.702840  |
| 6     | -0.985728 | 1.584252  | 1.599094  | 6  | -0.710764 | 1.739576  | 1.613441  |
| 5     | 1.948580  | -1.142060 | 0.515261  | 5  | 1.863130  | -1.385490 | 0.689689  |
| 5     | -1.948580 | 1.142060  | 0.515261  | 5  | -1.863130 | 1.385490  | 0.689689  |
| 5     | 0.177754  | 2.288932  | 0.931719  | 5  | 0.393892  | 2.345644  | 0.753347  |
| 5     | -0.177754 | -2.288932 | 0.931719  | 5  | -0.393892 | -2.345644 | 0.753347  |
| 7     | 1.212384  | -1.336280 | -0.762669 | 7  | 1.290272  | -1.435147 | -0.682227 |
| 7     | 0.000000  | -2.047480 | -0.513851 | 7  | 0.000000  | -2.072294 | -0.637618 |
| 7     | -1.212384 | 1.336280  | -0.762669 | 7  | -1.290272 | 1.435147  | -0.682227 |
| 7     | 0.000000  | 2.047480  | -0.513851 | 7  | 0.000000  | 2.072294  | -0.637618 |
| 6     | -3.404206 | 0.544196  | 0.481322  | 6  | -3.377887 | 0.979518  | 0.922485  |
| 1     | -4.140176 | 1.297198  | 0.168866  | 1  | -4.054602 | 1.798233  | 0.624394  |
| 1     | -3.511229 | -0.297505 | -0.218052 | 1  | -3.688548 | 0.088062  | 0.354175  |
| 1     | -3.717917 | 0.185656  | 1.465521  | 1  | -3.569778 | 0.775713  | 1.984243  |
| 6     | 1.454154  | 3.056338  | 1.437622  | 6  | 1.760111  | 3.079561  | 1.089644  |
| 1     | 1.464631  | 3.148268  | 2.526623  | 1  | 1.953620  | 3.067760  | 2.170454  |
| 1     | 2.386103  | 2.548011  | 1.154424  | 1  | 2.636000  | 2.627075  | 0.597372  |
| 1     | 1.518450  | 4.072083  | 1.025765  | 1  | 1.730533  | 4.136655  | 0.777092  |
| 6     | 0.892926  | 2.294175  | -1.616847 | 6  | 0.732625  | 2.259383  | -1.873866 |
| 1     | 0.446351  | 2.950321  | -2.375670 | 1  | 0.204685  | 2.923072  | -2.576356 |
| 1     | 1.776215  | 2.792935  | -1.212959 | 1  | 1.686873  | 2.730856  | -1.616015 |
| 1     | 1.220844  | 1.367450  | -2.111707 | 1  | 0.948681  | 1.308632  | -2.388571 |
| 6     | -1.732820 | 1.344347  | -2.106436 | 6  | -2.035068 | 1.498817  | -1.927689 |
| 1     | -2.001883 | 2.358396  | -2.435916 | 1  | -2.299861 | 2.536688  | -2.193623 |
| 1     | -1.029652 | 0.922638  | -2.838449 | 1  | -1.489194 | 1.053764  | -2.772245 |
| 1     | -2.639965 | 0.735417  | -2.111845 | 1  | -2.963402 | 0.935314  | -1.785017 |
| 6     | 3.404206  | -0.544196 | 0.481322  | 6  | 3.377887  | -0.979518 | 0.922485  |
| 1     | 3.511229  | 0.297505  | -0.218052 | 1  | 3.688548  | -0.088062 | 0.354175  |
| 1     | 3.717917  | -0.185656 | 1.465521  | 1  | 3.569778  | -0.775713 | 1.984243  |
| 1     | 4.140176  | -1.297198 | 0.168866  | 1  | 4.054602  | -1.798233 | 0.624394  |
| 6     | -1.454154 | -3.056338 | 1.437622  | 6  | -1.760111 | -3.079561 | 1.089644  |
| 1     | -2.386103 | -2.548011 | 1.154424  | 1  | -2.636000 | -2.627075 | 0.597372  |
| 1     | -1.518450 | -4.072083 | 1.025765  | 1  | -1.730533 | -4.136655 | 0.777092  |
| 1     | -1.464631 | -3.148268 | 2.526623  | 1  | -1.953620 | -3.067760 | 2.170454  |
| 6     | -0.892926 | -2.294175 | -1.616847 | 6  | -0.732625 | -2.259383 | -1.873866 |
| 1     | -0.446351 | -2.950321 | -2.375670 | 1  | -0.204685 | -2.923072 | -2.576356 |
| 1     | -1.776215 | -2.792935 | -1.212959 | 1  | -1.686873 | -2.730856 | -1.616015 |
| 1     | -1.220844 | -1.367450 | -2.111707 | 1  | -0.948681 | -1.308632 | -2.388571 |
| 6     | 1.732820  | -1.344347 | -2.106436 | 6  | 2.035068  | -1.498817 | -1.927689 |
| 1     | 2.001883  | -2.358396 | -2.435916 | 1  | 2.299861  | -2.536688 | -2.193623 |
| 1     | 1.029652  | -0.922638 | -2.838449 | 1  | 1.489194  | -1.053764 | -2.772245 |
| 1     | 2.639965  | -0.735417 | -2.111845 | 1  | 2.963402  | -0.935314 | -1.785017 |
| 27    | 0.000000  | 0.000000  | 0.535252  | 27 | 0.000000  | 0.000000  | 0.533400  |

**Table S34.** Atomic coordinates of the optimized structures for the Ni-s-180 complexes.

| M06-L |           |           | B3LYP*    |    |           |           |           |
|-------|-----------|-----------|-----------|----|-----------|-----------|-----------|
| X     | Y         | Z         | X         | Y  | Z         |           |           |
| 6     | 1.016579  | -0.241430 | 1.803994  | 6  | 1.097712  | -0.206926 | 1.807426  |
| 1     | 0.597368  | 0.079105  | 2.756569  | 1  | 0.707046  | 0.096524  | 2.780457  |
| 1     | -0.597368 | -0.079105 | -2.756569 | 1  | -0.707046 | -0.096524 | -2.780457 |
| 6     | -1.016579 | 0.241430  | -1.803994 | 6  | -1.097712 | 0.206926  | -1.807426 |
| 5     | 2.055084  | 0.543792  | 0.995877  | 5  | 2.211050  | 0.532563  | 1.033726  |
| 5     | -0.829637 | 1.577755  | -1.142873 | 5  | -0.922314 | 1.554471  | -1.155541 |
| 5     | -2.055084 | -0.543792 | -0.995877 | 5  | -2.211050 | -0.532563 | -1.033726 |
| 5     | 0.829637  | -1.577755 | 1.142873  | 5  | 0.922314  | -1.554471 | 1.155541  |
| 7     | 2.437192  | -0.285524 | -0.163388 | 7  | 2.518043  | -0.265813 | -0.152942 |
| 7     | 1.429262  | -1.330162 | -0.218049 | 7  | 1.471474  | -1.293483 | -0.224424 |
| 7     | -1.429262 | 1.330162  | 0.218049  | 7  | -1.471474 | 1.293483  | 0.224424  |
| 7     | -2.437192 | 0.285524  | 0.163388  | 7  | -2.518043 | 0.265813  | 0.152942  |
| 6     | -0.123868 | 2.943212  | -1.464117 | 6  | -0.266407 | 2.940370  | -1.547672 |
| 1     | -0.857531 | 3.745001  | -1.622432 | 1  | -1.045446 | 3.708124  | -1.691904 |
| 1     | 0.534634  | 3.287192  | -0.654915 | 1  | 0.424758  | 3.333381  | -0.785503 |
| 1     | 0.483216  | 2.885411  | -2.372577 | 1  | 0.288327  | 2.864699  | -2.492844 |
| 6     | -2.726462 | -1.947034 | -1.219842 | 6  | -2.968868 | -1.892302 | -1.325867 |
| 1     | -2.295108 | -2.486963 | -2.068168 | 1  | -2.753780 | -2.273057 | -2.333320 |
| 1     | -2.650347 | -2.600212 | -0.340113 | 1  | -2.676249 | -2.677232 | -0.608515 |
| 1     | -3.800198 | -1.840549 | -1.421602 | 1  | -4.061120 | -1.780276 | -1.236833 |
| 6     | -2.849956 | -0.244321 | 1.446925  | 6  | -3.012725 | -0.249397 | 1.421437  |
| 1     | -3.431568 | 0.484553  | 2.024630  | 1  | -3.569325 | 0.512147  | 1.987413  |
| 1     | -3.497808 | -1.100584 | 1.247469  | 1  | -3.710572 | -1.060881 | 1.185039  |
| 1     | -2.002998 | -0.588558 | 2.065002  | 1  | -2.214419 | -0.656015 | 2.066122  |
| 6     | -1.569433 | 2.309924  | 1.277279  | 6  | -1.652694 | 2.311887  | 1.253681  |
| 1     | -2.515979 | 2.853979  | 1.167490  | 1  | -2.604099 | 2.844652  | 1.097222  |
| 1     | -1.534199 | 1.846566  | 2.267820  | 1  | -1.642308 | 1.877836  | 2.260603  |
| 1     | -0.739972 | 3.015412  | 1.195944  | 1  | -0.826121 | 3.025393  | 1.176485  |
| 6     | 2.726462  | 1.947034  | 1.219842  | 6  | 2.968868  | 1.892302  | 1.325867  |
| 1     | 2.650347  | 2.600212  | 0.340113  | 1  | 2.676249  | 2.677232  | 0.608515  |
| 1     | 2.295108  | 2.486963  | 2.068168  | 1  | 2.753780  | 2.273057  | 2.333320  |
| 1     | 3.800198  | 1.840549  | 1.421602  | 1  | 4.061120  | 1.780276  | 1.236833  |
| 6     | 0.123868  | -2.943212 | 1.464117  | 6  | 0.266407  | -2.940370 | 1.547672  |
| 1     | -0.534634 | -3.287192 | 0.654915  | 1  | -0.424758 | -3.333381 | 0.785503  |
| 1     | 0.857531  | -3.745001 | 1.622432  | 1  | 1.045446  | -3.708124 | 1.691904  |
| 1     | -0.483216 | -2.885411 | 2.372577  | 1  | -0.288327 | -2.864699 | 2.492844  |
| 6     | 1.569433  | -2.309924 | -1.277279 | 6  | 1.652694  | -2.311887 | -1.253681 |
| 1     | 2.515979  | -2.853979 | -1.167490 | 1  | 2.604099  | -2.844652 | -1.097222 |
| 1     | 0.739972  | -3.015412 | -1.195944 | 1  | 0.826121  | -3.025393 | -1.176485 |
| 1     | 1.534199  | -1.846566 | -2.267820 | 1  | 1.642308  | -1.877836 | -2.260603 |
| 6     | 2.849956  | 0.244321  | -1.446925 | 6  | 3.012725  | 0.249397  | -1.421437 |
| 1     | 3.431568  | -0.484553 | -2.024630 | 1  | 3.569325  | -0.512147 | -1.987413 |
| 1     | 2.002998  | 0.588558  | -2.065002 | 1  | 2.214419  | 0.656015  | -2.066122 |
| 1     | 3.497808  | 1.100584  | -1.247469 | 1  | 3.710572  | 1.060881  | -1.185039 |
| 28    | 0.000000  | 0.000000  | 0.000000  | 28 | 0.000000  | 0.000000  | 0.000000  |

**Table S35.** Atomic coordinates of the optimized structures for the Ni-t-180 complexes.

| M06-L |           |           | B3LYP*    |    |           |           |           |
|-------|-----------|-----------|-----------|----|-----------|-----------|-----------|
| X     | Y         | Z         | X         | Y  | Z         |           |           |
| 6     | 0.000000  | 2.143836  | 0.000086  | 6  | 0.000000  | 2.188000  | 0.000110  |
| 1     | -0.909249 | 2.741929  | 0.000140  | 1  | -0.904426 | 2.798355  | 0.000182  |
| 1     | 0.909249  | -2.741929 | 0.000140  | 1  | 0.904426  | -2.798355 | 0.000182  |
| 6     | 0.000000  | -2.143836 | 0.000086  | 6  | 0.000000  | -2.188000 | 0.000110  |
| 5     | 0.765549  | 1.709252  | -1.228341 | 5  | 0.792616  | 1.785448  | -1.229666 |
| 5     | -0.765549 | -1.709252 | -1.228341 | 5  | -0.792616 | -1.785448 | -1.229666 |
| 5     | -0.765653 | -1.709179 | 1.228426  | 5  | -0.792754 | -1.785357 | 1.229773  |
| 5     | 0.765653  | 1.709179  | 1.228426  | 5  | 0.792754  | 1.785357  | 1.229773  |
| 7     | 1.871143  | 0.862092  | -0.714879 | 7  | 1.882814  | 0.922200  | -0.719298 |
| 7     | 1.871222  | 0.862077  | 0.714824  | 7  | 1.882913  | 0.922179  | 0.719225  |
| 7     | -1.871143 | -0.862092 | -0.714879 | 7  | -1.882814 | -0.922200 | -0.719298 |
| 7     | -1.871222 | -0.862077 | 0.714824  | 7  | -1.882913 | -0.922179 | 0.719225  |
| 6     | -0.586619 | -1.910188 | -2.778889 | 6  | -0.634802 | -2.058086 | -2.785126 |
| 1     | -1.241656 | -2.706573 | -3.155295 | 1  | -1.409222 | -2.758696 | -3.139505 |
| 1     | -0.816582 | -1.014115 | -3.370252 | 1  | -0.721171 | -1.150985 | -3.404019 |
| 1     | 0.436805  | -2.208691 | -3.029237 | 1  | 0.337015  | -2.519342 | -3.008043 |
| 6     | -0.586836 | -1.910020 | 2.779000  | 6  | -0.635082 | -2.057867 | 2.785270  |
| 1     | 0.436594  | -2.208422 | 3.029445  | 1  | 0.336711  | -2.519115 | 3.008309  |
| 1     | -0.816921 | -1.013938 | 3.370301  | 1  | -0.721491 | -1.150714 | 3.404080  |
| 1     | -1.241833 | -2.706445 | 3.155388  | 1  | -1.409540 | -2.758438 | 3.139642  |
| 6     | -2.888917 | -0.114357 | 1.409417  | 6  | -2.964578 | -0.264591 | 1.427843  |
| 1     | -3.892981 | -0.517070 | 1.221703  | 1  | -3.934451 | -0.753534 | 1.241678  |
| 1     | -2.680374 | -0.202475 | 2.477339  | 1  | -2.742782 | -0.342447 | 2.497159  |
| 1     | -2.878386 | 0.951339  | 1.147099  | 1  | -3.044721 | 0.801217  | 1.172174  |
| 6     | -2.888862 | -0.114532 | -1.409606 | 6  | -2.964508 | -0.264839 | -1.428081 |
| 1     | -3.892888 | -0.517414 | -1.222038 | 1  | -3.934306 | -0.753990 | -1.242066 |
| 1     | -2.878546 | 0.951161  | -1.147272 | 1  | -3.044918 | 0.800950  | -1.172420 |
| 1     | -2.680153 | -0.202599 | -2.477499 | 1  | -2.742531 | -0.342641 | -2.497364 |
| 6     | 0.586619  | 1.910188  | -2.778889 | 6  | 0.634802  | 2.058086  | -2.785126 |
| 1     | 0.816582  | 1.014115  | -3.370252 | 1  | 0.721171  | 1.150985  | -3.404019 |
| 1     | -0.436805 | 2.208691  | -3.029237 | 1  | -0.337015 | 2.519342  | -3.008043 |
| 1     | 1.241656  | 2.706573  | -3.155295 | 1  | 1.409222  | 2.758696  | -3.139505 |
| 6     | 0.586836  | 1.910020  | 2.779000  | 6  | 0.635082  | 2.057867  | 2.785270  |
| 1     | 0.816921  | 1.013938  | 3.370301  | 1  | 0.721491  | 1.150714  | 3.404080  |
| 1     | 1.241833  | 2.706445  | 3.155388  | 1  | 1.409540  | 2.758438  | 3.139642  |
| 1     | -0.436594 | 2.208422  | 3.029445  | 1  | -0.336711 | 2.519115  | 3.008309  |
| 6     | 2.888917  | 0.114357  | 1.409417  | 6  | 2.964578  | 0.264591  | 1.427843  |
| 1     | 3.892981  | 0.517070  | 1.221703  | 1  | 3.934451  | 0.753534  | 1.241678  |
| 1     | 2.680374  | 0.202475  | 2.477339  | 1  | 2.742782  | 0.342447  | 2.497159  |
| 1     | 2.878386  | -0.951339 | 1.147099  | 1  | 3.044721  | -0.801217 | 1.172174  |
| 6     | 2.888862  | 0.114532  | -1.409606 | 6  | 2.964508  | 0.264839  | -1.428081 |
| 1     | 3.892888  | 0.517414  | -1.222038 | 1  | 3.934306  | 0.753990  | -1.242066 |
| 1     | 2.878546  | -0.951161 | -1.147272 | 1  | 3.044918  | -0.800950 | -1.172420 |
| 1     | 2.680153  | 0.202599  | -2.477499 | 1  | 2.742531  | 0.342641  | -2.497364 |
| 28    | 0.000000  | 0.000000  | 0.000006  | 28 | 0.000000  | 0.000000  | 0.000005  |
